# 1 **Arsenite methyltransferase 3 regulates hepatic energy** 2 **metabolism which dictates the hepatic response to arsenic** 3 **exposure**

4  
5 Patrice Delaney<sup>1</sup>, Nouf Khan<sup>1</sup>, Matthew J. O'Connor<sup>2</sup>, Elizabeth Mayela Ambrosio<sup>5</sup>,  
6 Anna Garcia-Sabaté<sup>3</sup>, Jeremy C. M. Teo<sup>3</sup>, Spiros A. Pergantis<sup>4</sup>, Elke Ober<sup>5</sup> and Kirsten  
7 C. Sadler<sup>1,6,\*</sup>

8  
9 <sup>1</sup> Biology Program, New York University Abu Dhabi, Saadiyat Campus, P.O. Box  
10 129188, Abu Dhabi, United Arab Emirates

11 <sup>2</sup> Core Technology Platform, New York University Abu Dhabi, Saadiyat Campus, P.O.  
12 Box 129188, Abu Dhabi, United Arab Emirates

13 <sup>3</sup> Engineering Division, New York University Abu Dhabi, Saadiyat Campus, P.O. Box  
14 129188, Abu Dhabi, United Arab Emirates

15 <sup>4</sup> Department of Chemistry, University of Crete, Heraklion, Crete, 70013, Greece

16 <sup>5</sup> Danish Stem Cell Center (DanStem), University of Copenhagen, Copenhagen,  
17 Denmark

18 <sup>6</sup> Center for Genomics and Systems Biology (CGSB), New York University Abu Dhabi,  
19 P.O. Box 129188, Abu Dhabi, UAE

20  
21  
22  
23  
24  
25 \*To whom correspondence should be addressed:

26 Kirsten C. Sadler  
27 New York University Abu Dhabi  
28 P.O. Box 129188  
29 Abu Dhabi, United Arab Emirates  
30 Office: +971 2 628 4569  
31 Mobile: +971 56 832 7587  
32 email: [kirsten.edepli@nyu.edu](mailto:kirsten.edepli@nyu.edu)

33  
34 *Key words:* Arsenite Methyltransferase (As3mt), Zebrafish, Inorganic Arsenic, Liver,  
35 Hepatotoxicity, Fatty Liver

36  
37 The authors declare no conflict of interest.

38  
39 **Classification:** Major: Biological Science; Minor: *Genetics*  
40

41 **ABSTRACT**

42 Inorganic arsenic (iAs(III)) is among the most pervasive environmental toxicants in the  
43 world. The iAs metabolizing enzyme, arsenite methyltransferase (*AS3MT*), is a key  
44 mediator of iAs(III) toxicity and has been almost exclusively investigated in the context of  
45 iAs(III) exposure. We use functional genomics approach with zebrafish *as3mt* mutants  
46 which lack arsenite methyltransferase activity to uncover novel, arsenic-independent  
47 functions for As3mt. Transcriptomic analysis of untreated whole larvae, and the larval and  
48 adult livers from *as3mt* mutants revealed thousands of differentially expressed genes  
49 (DEGs) compared to wild-type controls. These were enriched for genes functioning in the  
50 ribosome or mitochondria. Nearly all genes in the citric acid cycle and mitochondrial  
51 transport were downregulated in *as3mt* mutant livers. This resulted in reduction in reactive  
52 oxygen species levels by half and fatty liver in 81% of *as3mt* mutant larvae. An inverse  
53 expression pattern was detected for over 2,000 of the As3mt regulated DEGs in the liver  
54 of larvae with transgenic overexpression of As3mt in hepatocytes. Replacing *as3mt*  
55 expression in hepatocytes of *as3mt* mutants prevented fatty liver, demonstrating that  
56 As3mt has novel, cell-autonomous and arsenic-independent functions regulating  
57 mitochondrial metabolism. We suggest that these functions contribute to iAs toxicity, as  
58 the mitochondrial function genes that were downregulated in the liver of unexposed *as3mt*  
59 mutants were further downregulated upon iAs exposure and *as3mt* mutants were  
60 sensitized to iAs. This indicates that As3mt regulates hepatic energy metabolism and  
61 demonstrates that, in addition to its role in iAs detoxification, the physiological functions  
62 of As3mt contribute to arsenic toxicity.

63  
64 **SIGNIFICANCE**

65  
66 Arsenic is an endemic environmental toxicant, and the current paradigm is that  
67 susceptibility to arsenic toxicity is dictated by levels of expression of the arsenite 3  
68 methyltransferase gene (*As3mt*), which is dedicated enzyme involved in arsenic  
69 detoxification. Our data showing that *As3mt* serves arsenic-independent functions in  
70 energy metabolism challenge this paradigm. We show that zebrafish *as3mt* mutants have  
71 loss of mitochondrial function and develop fatty liver and suggest that *as3mt* mutants are  
72 sensitized to arsenic toxicity due, in part, to impaired mitochondrial function. This finding  
73 opens an entirely new area of study to identify the cellular function of *As3mt* and further  
74 advances the understanding of how genetic variants in *As3mt* confer sensitivity arsenic  
75 toxicology.  
76

77 **INTRODUCTION** (3903 words)

78

79 The World Health Organization (WHO) has placed iAs(III) within the top ten chemicals of  
80 major public concern because roughly a third of the world's population is at risk of  
81 exposure to this devastating toxicant (1). Exposure to iAs is associated with major health  
82 ramifications, including multiple forms of cancer, skin lesions, cardiovascular disease,  
83 neurological defects, diabetes and liver disease (2-6). Arsenic metabolizing genes are  
84 highly conserved in metazoa (7); in humans and other vertebrates, arsenite  
85 methyltransferase (AS3MT) catalyzes trivalent iAs to mono- or dimethylated arsenic  
86 (MMA, DMA) using s-adenosyl methionine (SAM) as a donor and glutathione (GSH) as a  
87 reducing agent. This is hypothesized to reduce retention of iAs by converting ionic bonds  
88 into more stable covalent bonds, preventing promiscuous interactions with other cellular  
89 components and increasing the arsenic clearance rate (3). While As3mt activity can  
90 reduce these damaging effects of iAs(III), the process of iAs metabolism by As3mt can  
91 deplete SAM and cellular antioxidant stores, and generate reactive oxygen species  
92 (ROS), all of which have been proposed to contribute to arsenic toxicity in humans (8)  
93 and animal models (9-12).

94

95 The importance of As3mt in arsenic-induced health outcomes is predicted on the finding  
96 that single nucleotide polymorphisms (SNPs) in the *AS3MT* locus correlate with  
97 differential susceptibility to iAs toxicity in humans. For example, communities in the Andes  
98 Mountains, which have historically resided near rivers with arsenic concentrations 100  
99 fold higher than the WHO's safe limit of 10 µg/L, have *AS3MT* haplotypes associated with  
100 more efficient methylation of iAs and partial resistance to iAs (13). Many protective SNPs  
101 are found within *AS3MT* introns, and some SNPs increase expression of *AS3MT* which  
102 is proposed as the mechanism increasing iAs methylation capacity, decreasing iAs  
103 retention and lowering its toxic effects (13). In support of this, one study found an  
104 association between increased plasma *AS3MT* expression and putative protective  
105 *AS3MT* SNPs whereas another discovered correlation between reduced iAs metabolism  
106 efficacy and reduced *AS3MT* expression in people with *AS3MT* haplotypes associated  
107 with iAs susceptibility (14, 15). Studies of *As3mt* knock-out (KO) mice support this, as  
108 these have higher iAs retention and toxicity compared to wild-type (WT) mice (16).

109

110 The prevailing paradigm is that the sole function of AS3MT is to methylate arsenic.  
111 Several lines of evidence suggest an alternative: AS3MT is highly conserved, is  
112 expressed in a tissue specific fashion in the absence of iAs, and *As3mt* KO mice have  
113 metabolic changes (17, 18), with differences in the levels of specific phosphatidylcholine  
114 (PC) species (18) and cultured cells with *AS3MT* knockdown decreases proliferation (19).  
115 Moreover, other genome-wide association studies have found that variants of an AS3MT  
116 isoform correlates with schizophrenia (20, 21) and depletion of AS3MT in neurons  
117 resulted in the differential expression of over 1,400 genes (22). However, in the decades  
118 since AS3MT was discovered, aside from these few studies, its role in cellular  
119 homeostasis has not been investigated.

120

121 Here, we present a functional genomics study with *as3mt* mutant (*as3mt*<sup>-/-</sup>) zebrafish that  
122 uncovers an entirely new function for As3mt independent of its role in iAs metabolism.

123 Transcriptomic analysis of *as3mt*<sup>-/-</sup> whole larvae, and livers from larvae and adults  
124 revealed that over 3,000 genes were differentially expressed in the absence of arsenic.  
125 The downregulated genes were enriched for functions in the ribosome and mitochondrial  
126 membrane. Transgenic expression of *as3mt* in hepatocytes increases the expression of  
127 these same genes, including all those that function in the mitochondria. This indicates  
128 As3mt as a direct regulator of these genes and pathways in the liver. Importantly, these  
129 transcriptomic changes have functional consequences as we found lower levels of ROS  
130 produced by *as3mt*<sup>-/-</sup> mutants, and nearly all develop steatosis by 120 hours post-  
131 fertilization (hpf). Steatosis was rescued by transgenic expression of *as3mt* only in  
132 hepatocytes, demonstrating a cell autonomous function of As3mt in hepatic lipid  
133 metabolism. Importantly, iAs is more toxic to *as3mt* mutant larvae compared to WTs.  
134 Despite a largely similar transcriptional response to iAs exposure, most of same  
135 mitochondrial genes that were downregulated in unexposed *as3mt*<sup>-/-</sup> mutants are further  
136 decrease in expression following iAs exposure. This provides direct evidence of novel  
137 functions of As3mt in energy homeostasis and we proposed that, in addition to the  
138 essential role in iAs metabolism, the function of As3mt in cellular metabolism influence  
139 susceptibility to arsenic.

140

## 141 RESULTS

142

### 143 **As3mt is highly expressed in hepatocytes and is enzymatically active in zebrafish** 144 **larvae**

145

146 Our previous studies in zebrafish demonstrated that *as3mt* mRNA is maternally provided  
147 and dynamically expressed during zebrafish development, with expression enriched in  
148 the liver by 120 hpf (11). We used a gene trap reporter line (23) for *as3mt*  
149 (*Tg(UAS:GFP;gSAIzGFFD886A)*) which shows that expression is high and restricted to  
150 the liver as early as 72 hpf (**Figure S1A-1B**). RNAseq analysis of single livers dissected  
151 from WT 120 hpf larvae and adults shows that *as3mt* falls within the top ~4% of genes  
152 expressed in the zebrafish liver (**Figure S1C**). Immunofluorescence of the WT liver at 120  
153 hpf shows that As3mt is localized to punctate structures in hepatocytes (**Figure S1D**).

154

155 We established As3mt activity in zebrafish larvae by treating embryos from 6-120 hpf with  
156 1 mM sodium arsenite (iAs(III)) using a previously optimized protocol (12, 24). Ion  
157 chromatography (IC) inductively coupled plasma mass spectrometry (ICP-MS) was used  
158 to detect As(III), its oxidized form As(V), and the metabolic products DMA and MMA, with  
159 a detection range from 0.75 – 12.5 ppb of arsenic species. As expected, no arsenic  
160 species were detected in untreated larvae and DMA and MMA were detected in treated  
161 larvae, albeit at reduced levels compared to As(III) (**Figure S1E**). We also detected a tri-  
162 methylated arsenical species, arsenobetaine (AsB), which is abundant in marine animals  
163 and some freshwater fish, and is proposed to be generated by bacterial constituents of  
164 the microbiome (25). Together, these data show that in zebrafish larvae, as in mammals  
165 (26, 27), As3mt is specifically and highly expressed in the liver and is enzymatically active.

166

### 167 **Loss of *as3mt* increases iAs accumulation and toxicity in zebrafish larvae**

168



169 We generated zebrafish *as3mt* mutants using CRISPR/Cas9 using an sgRNA targeting  
170 exon 3 of the *as3mt* locus (**Figure S2A**). We identified an allele with eight base pair indel  
171 which causes a frameshift that generates a novel 13 amino acid sequence following  
172 amino acid 3 and a premature stop codon predicted to truncate the protein upstream of  
173 the catalytic domain (**Figure S2B-F**). We bred these to homozygosity and, as predicted  
174 based on the lack of overt phenotypes in *As3mt* knock out mice (16, 28), *as3mt*<sup>-/-</sup> mutants  
175 showed no significant difference in development, morphology, size, reproductive capacity  
176 or behavior (**Figure 1A-C** and not shown). Exposure to 1 mM iAs(III) from 6-120 hpf and  
177 assessment As(III), DMA, MMA and As(V) levels using IC-ICP-MS showed markedly  
178 increased levels of As(III) and undetectable levels of DMA and MMA in *as3mt*<sup>-/-</sup> mutants  
179 (**Figure 1D**). This demonstrates that this is null or strongly hypomorphic allele.

180  
181 *As3mt* KO mice are more sensitive to the toxic effects of iAs (16, 28) and we find that  
182 exposing *as3mt*<sup>-/-</sup> mutants and WT embryos to a range of iAs(III) concentrations from 6-  
183 120 hpf reduced the lethal concentration 50 (LC<sub>50</sub>) from ~1.9 mM iAs(III) in WT larvae to  
184 ~1.1 mM in *as3mt*<sup>-/-</sup> mutants (**Figure 1E**). At lower concentrations of iAs(III), *as3mt*<sup>-/-</sup>  
185 mutants developed more severe edema, grey yolk (**Figure 1F**) and melanocyte  
186 expansion (**Figure 1G-H**) compared to WT embryos. These effects were dose dependent  
187 and significantly increased in mutants (**Figure 1I**). Thus, while loss of *as3mt* does not  
188 result in any gross morphological defects in zebrafish embryos, it significantly increases  
189 iAs(III) retention and toxicity.

### 191 **Thousands of genes deregulated in *as3mt* mutants**

192  
193 We hypothesized that if *as3mt* has physiological functions that are independent of iAs(III)  
194 metabolism then the loss of *As3mt* would induce a transcriptional response in the  
195 absence of iAs exposure. We performed RNAseq analysis on pools of WT and *as3mt*<sup>-/-</sup>  
196 mutant whole larvae and livers at 120 hpf and normalized gene expression of mutants to  
197 WT controls (**Figure 2A**). This uncovered 3,400 differentially expressed genes (DEGs) in  
198 whole *as3mt*<sup>-/-</sup> mutant larvae and 2,812 DEGs in mutant livers (*p*<sub>adj</sub> < 0.05; **Figure 2B**;  
199 **Supplemental Table S1-2**), with 701 DEGs common to both datasets, 86% of which (608  
200 genes) show a strong positive correlation in expression (*r* = 0.832; **Figure 2B** and **S3A**).  
201 To determine if this correlation extended to genes that were differentially expressed in  
202 one dataset but did not reach statistical significance in the other, we plotted the  
203 expression of the unified geneset of DEGs from both samples which showed a strong  
204 positive correlation (*r* = 0.640) of 60% of these genes (3,280 genes), with 1,457 genes  
205 that were upregulated and 1,823 genes downregulated in both samples (**Figure 2C**). This  
206 indicates that the loss of *As3mt* disrupts cellular homeostasis during zebrafish  
207 development, resulting in a marked transcriptional response.

208  
209 Gene ontology (GO) analysis of these 3,280 positively correlated genes revealed that  
210 while the upregulated genes were enriched for a variety of cellular functions, nearly all of  
211 the downregulated genes were enriched in pathways related to ribosome biogenesis and  
212 function, ATP generation and xenobiotic metabolism (**Figure 2D**) and functioned in the in  
213 ribosome or mitochondrial membrane (**Figure 2E**). This same pattern was detected in the  
214 shared, positively correlated DEGs (**Figure S3B**). Interestingly, ribosome function and

215 translation were also enriched in AS3MT deficient neurons (22). This suggests that loss  
216 of As3mt during development deregulates ribosome function, protein translation and  
217 mitochondrial function.

218  
219 To determine if these changes persisted through adulthood, we performed RNAseq  
220 analysis on livers from male and female WT and *as3mt*<sup>-/-</sup> mutant adult zebrafish. This  
221 showed sex specific differences in gene expression in both *as3mt*<sup>-/-</sup> mutants and WTs  
222 (**Figure S4A-B**). The expression pattern in mutant males shows similar expression profile  
223 to larval livers, with 212 DEGs common to the *as3mt*<sup>-/-</sup> mutant adult male livers, and nearly  
224 all positively correlated in their expression in both samples (**Figure S3C-D Table S3**).  
225 Importantly, all the downregulated DEGs in *as3mt*<sup>-/-</sup> mutant larval livers that function in  
226 ATP synthesis and aerobic respiration were also downregulated in adult male *as3mt*<sup>-/-</sup>  
227 livers (**Figure 2F**). Key genes regulating metabolic functions, including *vdac1*, which is  
228 essential for mitochondrial membrane transport (29), and *pemt*, which is required for PC  
229 synthesis (30) and for VLDL secretion (31), were significantly downregulated in larval and  
230 adult liver samples (**Figure S4F**). These data show that loss of *as3mt* elicits lifelong  
231 downregulation of genes that play important roles in mitochondrial and lipid metabolism  
232 in the liver, suggesting that these functions are perturbed by As3mt deficiency.

233

### 234 **Cell autonomous function of As3mt in hepatocyte energy metabolism**

235

236 To address the hepatocyte specific role of *as3mt*, we generated a transgenic zebrafish  
237 line with moderate (1.5-2 fold) overexpression of zebrafish *as3mt* in hepatocytes  
238 (*Tg(fabp10a:As3mt;cryaa:dsRed)* hereafter referred to as Tg-*as3mt*<sup>wt/tg</sup>; **Figure 3A-B**)  
239 which had no measurable effect on hepatic, biliary or endothelial cell morphology, hepatic  
240 architecture or liver function at 120 hpf (**Figure S5A-H**). RNAseq analysis of livers from  
241 120 hpf Tg-*as3mt*<sup>wt/tg</sup> larvae detected 139 DEGs (**Figure 3C**), 22 of which overlapped  
242 with the DEGs detected in *as3mt*<sup>-/-</sup> mutant larval livers (**Figure 3D**). Analysis of the unified  
243 geneset of all DEGs from both *as3mt*<sup>-/-</sup> mutant and Tg-*as3mt*<sup>wt/tg</sup> livers (2,929 genes;  
244 **Table S4**) showed that 60% (1,780 genes) of the genes upregulated in mutants were  
245 downregulated in transgenics, and *vice versa* ( $r = -0.177$ ) (**Figure 3E**). GO analysis of the  
246 negatively correlated genes revealed enrichment of ATP generation, respiration and  
247 metabolite precursor generation which were up in Tg-*as3mt*<sup>wt/tg</sup> and down in *as3mt*<sup>-/-</sup> livers  
248 (**Figure 4F**). UPSET analysis of the genes in these pathways demonstrated that many  
249 were shared between all the pathways involved in mitochondrial metabolism (**Figure 4G**).  
250 Notably, most genes functioning in the citric acid cycle (TCA) (**Table S5**) were  
251 downregulated in *as3mt*<sup>-/-</sup> mutant livers and upregulated in Tg-*as3mt*<sup>wt/tg</sup> livers (**Figure**  
252 **3H**). We conclude that mitochondrial transport and ATP generation in zebrafish  
253 hepatocytes is directly and specifically regulated by As3mt.

254

### 255 ***as3mt* loss in hepatocytes reduces ROS and causes fatty liver**

256

257 The gene expression profile shows expression of many genes that function in Complexes  
258 I-IV to be downregulated in *as3mt*<sup>-/-</sup> mutant livers, and Ingenuity Pathway Analysis  
259 predicts that NAD<sup>+</sup>, FAD<sup>+</sup> and electron transport all to be impaired (**Figure 4A**). Since  
260 Complex I is a major source of cellular ROS (32), we assessed ROS levels generated by

261 WT and *as3mt*<sup>-/-</sup> mutants at 120 hpf and found them decreased by an average of 38% in  
262 mutants (**Figure 4B**). Impaired mitochondrial function is a primary cause of non-alcoholic  
263 fatty liver disease (NAFLD) (33-35). We found that 81% of *as3mt*<sup>-/-</sup> mutants developed  
264 fatty liver (steatosis) by 120 hpf (Figure 5C). Steatosis incidence and severity were fully  
265 rescued in *as3mt*<sup>-/-</sup> mutants when *As3mt* expression was reintroduced only in hepatocytes  
266 by crossing to *Tg-as3mt*<sup>wt/tg</sup> (**Figure 4F-H**). Thus, the transcriptional effects of *as3mt*  
267 mutation translates to functional consequences for the liver, including causing fatty liver.  
268 Together, these data unequivocally demonstrate that *As3mt* has an arsenic-independent  
269 role in the liver.

270

### 271 **Loss of *as3mt* sensitizes to iAs(III) by deregulating mitochondrial function**

272

273 While AS3MT metabolism of arsenic is critical for reducing iAs(III) accumulation, we  
274 hypothesized that loss of *as3mt* can also contribute to iAs(III) toxicity by abrogating  
275 mitochondrial function, a central cellular target of arsenic (36). We carried out RNAseq  
276 analysis of the livers from WT and *as3mt*<sup>-/-</sup> mutant larvae treated with 1 mM iAs(III) from  
277 96-120 hpf and normalized each sample to untreated larvae of the same genotype  
278 (**Figure 5A; Table S6-7**). While there were significant differences based on both treatment  
279 and genotype (**Figure 5AB**), 88% of iAs(III) induced DEGs in WT livers were also  
280 differentially expressed and strongly linearly correlated in *as3mt*<sup>-/-</sup> mutant livers ( $r = 0.937$ ;  
281 **Figure 5C and S6A**). These genes were enriched in multiple pathways, including  
282 mitochondrial processes such as fatty acid beta-oxidation and RNA processing (**Figure**  
283 **S6B**). This indicates that the massive transcriptional response to iAs exposure is caused  
284 by the effects of iAs(III) on cellular homeostasis, and that the process of iAs(III)  
285 metabolism has little effect on the gene expression changes observed.

286

287 We reasoned that the increase in arsenic toxicity in *as3mt*<sup>-/-</sup> mutants was attributed either  
288 to a process that occurred in WT livers during iAs(III) exposure but was hindered in  
289 mutants, or to a process that occurred only in the mutants. We investigated this by  
290 analyzing the *As3mt* dependent DEGs – i.e those 882 genes which had no change (log2  
291 fold change < -1 or > 1) in expression in *as3mt*<sup>-/-</sup> mutants treated with iAs(III) but were  
292 significantly changed in WT treated samples. Surprisingly, GO analysis did not find any  
293 cellular pathway or cellular component that were enriched for this geneset. We next  
294 analyzed the 1,862 genes that had no change in expression (log2 fold change < -1 or >  
295 1) in WT livers exposed to iAs(III) but were significantly changed in *as3mt*<sup>-/-</sup> mutant livers  
296 only in response to iAs(III) (**Figure S6C**). These genes function in multiple unrelated  
297 pathways including ncRNA processing, transcription and glycosylation (**Figure S6D**). It is  
298 unclear to what extent these pathways are a response to iAs(III) accumulation or due to  
299 some other cellular defect caused by loss of *As3mt*.

300

301 We hypothesized that the disruption of mitochondrial function by *As3mt* deficiency  
302 (**Figures 2-3**) could impact the response to iAs(III) and, if so, this dependency would be  
303 reflected in the transcriptome of *as3mt*<sup>-/-</sup> mutants exposed to iAs(III). We analyzed the  
304 657 DEGs common to untreated and iAs(III) exposed *as3mt*<sup>-/-</sup> mutants which showed no  
305 change in expression in WT larvae exposed to iAs(III) (**Figure 5D**). Notably, the  
306 downregulated genes were enriched in multiple processes relevant to mitochondrial

307 function (**Figure 5E**). Pathway analysis of the unified set of DEGs in the liver of untreated  
308 and iAs exposed *as3mt*<sup>-/-</sup> mutants plus WT iAs exposed larvae revealed that only two  
309 pathways were shared in all conditions: lipid metabolic process and mitochondrial  
310 electron transport, NADH to ubiquinone (**Figure 5E, Figure S6E**), but only the latter  
311 pathway was more affected in iAs(III) exposed *as3mt*<sup>-/-</sup> mutants. Strikingly, 12 of the 19  
312 nuclear and mitochondrially encoded genes that function in the NADH to ubiquinone  
313 pathway (i.e. Complex I) were downregulated in response iAs(III) exposure in WT larvae  
314 and were further downregulate in iAs(III) exposed *as3mt*<sup>-/-</sup> mutants (**Figure 5F**). Thus,  
315 As3mt loss impairs mitochondrial function which further exacerbates the transcriptional  
316 response to iAs(III) exposure and, potentially, confers susceptibility to arsenic.

317

## 318 **DISCUSSION**

319

320 To date, As3mt has been almost exclusively studied as a dedicated iAs(III)  
321 methyltransferase. The data presented here open new areas of investigation for  
322 understanding how arsenic causes disease and also identifies As3mt as a previously  
323 unrecognized regulator of hepatic energy metabolism, ROS homeostasis and contributor  
324 to fatty liver. We found that *as3mt*<sup>-/-</sup> mutant zebrafish have thousands of DEGs in the  
325 whole animal which are even more profound in the liver, many of which persist to  
326 adulthood. *as3mt*<sup>-/-</sup> mutants develop fatty liver, which makes this finding clinically relevant  
327 as close to a third of the world's population is estimated to have fatty liver (37).  
328 Transcriptomic analysis uncovered a novel and essential role for As3mt in regulating  
329 mitochondrial function, specifically the electron transport chain, the TCA and ROS  
330 generation, with a prediction that oxidative phosphorylation and ATP generation are  
331 disrupted. This analysis also pointed to ribosome biogenesis and function as  
332 downregulated in *as3mt*<sup>-/-</sup> mutants, but the functional significance of that finding is not yet  
333 clear, but it is interesting that neurons depleted of AS3MT also show deregulation of the  
334 same pathways (22). Overall, this study indicates that the high levels of As3mt detected  
335 in hepatocytes is important for maintaining hepatic metabolism in the absence of iAs.

336

337 These data challenge the current paradigm that As3mt solely functions in iAs(III)  
338 detoxification. Our findings are also directly relevant to understanding iAs toxicity, as iAs  
339 causes mitochondrial defects by targeting the same pathways that we discovered to be  
340 dependent on As3mt (36). Finally, we provide a novel perspective on the wealth of data  
341 from epidemiological and experimental studies which have shown that iAs is less toxic in  
342 people who have higher As3mt levels, and is more toxic when As3mt is reduced or  
343 deleted (38-40). We report that while *as3mt*<sup>-/-</sup> mutants are sensitized to iAs(III) exposure,  
344 the majority of the gene expression changes caused by iAs are not different in *as3mt*<sup>-/-</sup>  
345 mutants suggesting that most iAs responsive genes are largely due to iAs(III). We  
346 propose that impaired mitochondrial function caused by As3mt deficiency in developing  
347 larvae synergizes with the effects of iAs(III) on the mitochondria, exacerbating toxicity  
348 (Figure 8A). This study not only uncovers a new disease relevant function for a long-  
349 studied enzyme, but it also suggests a novel mechanism by which an endemic toxicant  
350 causes pathology.

351



352 Our working model is that As3mt regulates the expression and/or function of many of the  
353 proteins in Complexes I-IV, the TCA cycle and oxidative phosphorylation (Figure 8A). The  
354 downregulation of NADH-ubiquinone oxidoreductase (*ndufs*) genes that are essential for  
355 electron transport and function in Complex I in *as3mt* mutants predicts that coenzyme Q  
356 (CoQ) is oxidized, and unable to serve as the electron acceptor from Complex I. This is  
357 significant because CoQ has been implicated as a contributor to fatty liver in humans and  
358 animal studies (41), and CoQ supplements have been shown to protect against  
359 acetaminophen hepatotoxicity (42), lowered lipid levels in other models, and decreased  
360 signs of liver damage in patients with fatty liver (43). We propose a potential therapeutic  
361 application of CoQ for arsenic toxicity.

362  
363 Our study provides a direct link between *as3mt* and fatty liver. It is well established that  
364 mitochondrial function is decreased in patients with fatty liver (44) and that mouse models  
365 of mitochondrial dysfunction and patients with mitochondrial disorders are characterized  
366 by fatty liver (45). We propose two mechanisms by which this happens (**Figure 6B**). First,  
367 fatty acid beta-oxidation is the main mechanism by which triglycerides are converted to  
368 ATP in hepatocytes. Thus, steatosis is a common outcome of toxicants or genetic  
369 perturbations that impair mitochondrial function. Second, downregulation of *pemt*, a key  
370 methyltransferase involved in phosphatidylcholine (PC) synthesis has been shown to  
371 reduce PC levels and resulting in steatosis in *pemt* KO mice (46). This is attributed to a  
372 failure of triglyceride packaging and export. In line with this, As3mt knock out mice have  
373 a complex pattern of changes to the levels of distinct PC species, suggesting that *As3mt*  
374 has uncharacterized roles in liver PC metabolism (18). We propose that downregulation  
375 of *pemt* in As3mt deficient cells both reduces PC synthesis, reducing VLDL packaging  
376 and lipid export (**Figure 6A**). Another study showed that AS3MT interacted with a  
377 component of the inflammasome and that this interaction contributed to steatosis  
378 following iAs exposure in mice (47), however we have not found this pathway to be  
379 disrupted in our studies. Further examination of the role of these pathways and of lipid  
380 flux in As3mt deficient hepatocytes will be important in future studies on the mechanism  
381 of steatosis in this model.

382  
383 It is not clear what As3mt functions contribute to deregulation of mitochondrial metabolism  
384 and fatty liver. Given the highly conserved methyltransferase domain in As3mt, which  
385 retains homology to both protein and RNA methyltransferases, we speculate that As3mt  
386 directly modulates upstream regulators of proteins in the mitochondrial membrane  
387 machinery through methylation. One study implicated an RNA methyltransferase in the  
388 hepatic response to arsenic (47), but it is not clear whether AS3MT also functioned in this  
389 methylation reaction. Indeed, other methyltransferase activity in Complex I assembly and  
390 function have been demonstrated as essential for zebrafish and knockdown of these  
391 proteins results in more severe larval phenotypes, specifically in delayed hatching and  
392 overall morphology (48). Many mitochondrial proteins are regulated by methylation (49),  
393 and it is possible that As3mt contributes to these modifications. Alternatively, *as3mt* may  
394 impose an indirect effect in mitochondrial function by modulating the metabolites that feed  
395 into the electron transport chain. In line with this hypothesis, we observed downregulation  
396 *vdac1*, which aids in exchange of key components including nucleotides, pyruvate,  
397 malate, succinate, NADH/NAD<sup>+</sup>, as well as lipids, cholesterol and ions. *Vdac1* acts as a



398 major hub for crosstalk between metabolism, apoptosis, signal transduction, and anti-  
399 oxidation protein and, in a mouse model of fatty liver, supplementing *Vdac1* improves  
400 beta-oxidation, reduces steatosis associated hepatic pathology (50). Which specific  
401 metabolic regulators are required for the effects observed in *As3mt* deficient hepatocytes  
402 requires further investigation.

403  
404 Surprisingly, *as3mt* was transcriptionally downregulated in the liver during *iAs(III)*  
405 exposure. This would predict that *iAs* methylation would be decreased as exposure  
406 continues. Moreover, as *iAs(III)* accumulates, *As3mt* is diverted from its cellular function,  
407 and that further downregulation of *as3mt* expression could exacerbate the cellular defects  
408 caused by loss of *As3mt* function. We predict this to have significant consequences for  
409 hepatic toxicity as both the damaging effects of *iAs(III)* accumulation combined with the  
410 loss of *As3mt* functions are relevant. Moreover, this finding provides a potential  
411 mechanism for how *iAs* exposure contributes to fatty liver (11).

412  
413 Finally, the findings presented here have major implications for *iAs(III)* endemic  
414 populations. To date, protective and maladaptive SNPs in the *AS3MT* locus in humans  
415 have been studied only in the context of *iAs(III)* metabolism, using serum or urinary *iAs(III)*  
416 and methylated species as an endpoint. Here, we find that *as3mt* has physiological roles  
417 which alone can augment *iAs* toxicity and our data showing that the transcriptomic  
418 response to *iAs* is largely similar in the presence or absence of *As3mt* suggest that loss  
419 of the arsenic metabolism function has less of an effect than its cellular, arsenic  
420 independent function. Future studies into *as3mt* expression and mitochondrial dynamics  
421 and downstream metabolic outputs will greatly aid the field of *iAs* toxicology and opens  
422 avenues for new *iAs* therapeutic strategies.

423

## 424 **MATERIALS & METHODS**

425

### 426 *Zebrafish husbandry, embryo rearing and iAs exposure*

427 All procedures were approved by and performed in accordance with the New York  
428 University Abu Dhabi Institutional Animal Care and Use Committee guidelines. Adult  
429 zebrafish were maintained on a 14:10 light:dark cycle at 28°C. Embryos were collected  
430 from natural spawning of group mating within 2 hours and were reared at 28°C.  
431 Experiments were conducted in 6-well plates (Corning, USA) with 20 embryos in 10 mL  
432 embryo medium, as described (24). Embryos were exposed to sodium meta-arsenite  
433 (Sigma-Aldrich, 7784-46-5; *iAs(III)*) by diluting 0.05 M stock solution to final  
434 concentrations ranging from 0.5 mM – 1.5 mM in embryo medium from either 6-120 hpf  
435 or 96-120 hpf as described (24). For all experiments, mortality was scored daily, dead  
436 embryos and larvae were removed upon identification, and morphology was recorded at  
437 120 hpf as readout of *iAs* toxicity. After 120 hpf, all treated larvae were washed 3 times  
438 in fresh embryo media prior to downstream investigations.

439

440 A note on nomenclature: As a default, we use human nomenclature for genes and  
441 proteins and use species relevant nomenclature for statements that refer to data from a  
442 specific organism.

443

#### 444 *as3mt*<sup>-/-</sup> Mutant Generation

445 sgRNA and primers targeting the *as3mt* gene was designed using ChopChop  
446 (<https://chopchop.cbu.uib.no/>) (Table S8). sgRNA was produced using sgRNA IVT kit  
447 (Takara Bio) by following the manufacturer's instructions and RNA was isolated by Trizol  
448 (Invitrogen). sgRNA was quantified by Qubit RNA BR kit and diluted at 50 ng/μl and stored  
449 as single use aliquots. WT-ABNYU embryos were injected with 1 nl of equal volume of  
450 previously diluted nls-Cas9 protein (IDT; 0.5 μl of nl-Cas9 added with 9.5 ul of 20 mM  
451 HEPES; 150 mM KCl, pH 7.5) and sgRNA (incubated at 37° C for 5 minutes). At 96 hpf,  
452 20 embryos were individually collected and genomic DNA was extracted by heat shock  
453 denaturation in 50 mM NaOH (95°C for 20 minutes). For each embryo, PCR was  
454 performed on genomic DNA by using Q5 High-Fidelity Taq Polymerase (New England  
455 Biolabs) followed by T7 endonuclease I assay (New England Biolabs) assay to detect  
456 mutations. For T7 endonuclease I assay, 10 μl of PCR product was incubated with 0.5 μl  
457 of T7e1 enzyme (New England Biolabs) for 30 minutes at 37°C. When the embryos  
458 reached sexual maturity (around 3 months), individual adult (F0) zebrafish were crossed  
459 to WT adults to generate the F1. DNA from putative was used to perform Sanger  
460 sequencing. Allele B F0 had an 8 bp indel mutation that was predicted to be a frameshift  
461 mutation. F1 embryos carrying this allele were used to generate *as3mt*<sup>-/-</sup> mutants.

462

#### 463 *Tg-as3mt*<sup>wt/tg</sup> Transgenic Generation

464 Hepatic overexpression of *as3mt* in transgenic zebrafish (*Tg(fabp10a:zas3mt;*  
465 *cry:dsRed)*) were generated by injecting a vector that contains 2,813 bp of the liver  
466 promoter, *fabp10a*, upstream of upstream the coding sequence of zebrafish *as3mt* as  
467 determined from alignment with the zebrafish reference genome. The transgene cassette  
468 was flanked by *tol2* sites and the vector was injected into 1-2 cell stage embryos along  
469 with transposase mRNA. Larvae positive for red lens were selected and raised to  
470 adulthood and outcrossed to WT (TAB 5) adults to generate the line.

#### 471 Sanger Sequencing

472 Genomic DNA was extracted from individual embryos by heat shock denaturation in 50  
473 mM NaOH (95°C for 20 minutes) and used for PCR by using Q5 High-Fidelity Taq  
474 Polymerase (New England Biolabs). The presence of specific amplicons was tested by  
475 running the PCR product on 1% agarose gel. 5 μl of PCR products were purified by  
476 ExoSAP-IT™ PCR Product Cleanup Reagent (Thermo Fisher Scientific) following  
477 manufacturer's instruction. Purified PCR products were sequenced using Sanger  
478 Sequencing Kit (Applied Biosystem) following manufacturer's instruction and loaded on  
479 SeqStudio Genetic Analyzer (Applied Biosystems). Results were visualized on  
480 SnapGene Viewer to assess the quality of the run and analyzed in Synthego  
481 (<https://ice.synthego.com/#/>) to identify mutants.

482

#### 483 Gene Expression Analysis

484 Pools of at least 5 livers were microdissected from 120 hpf zebrafish larvae with  
485 transgenic marked livers (*Tg(fabp10a:Caax-eGFP)*). Larvae were anesthetized in tricaine  
486 and immobilized in 3% methyl cellulose and the livers were removed using 30-gauge  
487 needles. RNA was extracted from livers using TRIzol (Thermo Fisher, 15596026) and  
488 precipitated with isopropanol. For RNAseq analyses, all samples were DNaseI

489 (ThermoFisher) treated. For library preparation, high quality of total RNA was QCed using  
490 Bioanalyzer (Agilent 2100; Agilent Technologies, Santa Clara, CA, USA) and quantified  
491 by Qubit fluorometer. Only RNA with RIN score >7 was used for library preparation.  
492 mRNA library was prepared using Illumina TruSeq V2 RNA sample Prep Kit (San Diego,  
493 CA) according to the manufacturer's protocol. Briefly, 100 ng of total mRNA was poly-A  
494 purified, fragmented, and first-strand cDNA reverse transcribed using random primers.  
495 Following second-strand cDNA synthesis, end repair, addition of a single A base,  
496 TrueSeq adapter-index was ligated to cDNA libraries, and PCR amplification of 12 cycles  
497 was done for enrichment, producing a 350-400 bp fragment including adapters. The  
498 fragment sizes and purity of the libraries were confirmed by Bioanalyzer 2100 (Agilent  
499 Technologies). The quantities of the libraries required for RNAseq were determined by  
500 real-time qPCR using a KAPA library quantification kit. Enriched cDNA libraries were  
501 sequenced using the Illumina NextSeq550 (Illumina).

502  
503 Raw FASTQ were first assessed for quality using FastQC v0.11.5. The reads were then  
504 passed through Trimmomatic v0.36 for quality trimming and adapter sequence removal,  
505 with the parameters (*ILLUMINACLIP: trimmomatic\_adapter.fa:2:30:10 TRAILING:3*  
506 *LEADING:3 SLIDINGWINDOW:4:15 MINLEN:36*). The trimmed read pairs were then  
507 processed with Fastp to remove poly-G tails and Novaseq/Nextseq specific artefacts.  
508 Following the quality trimming, the reads were assessed again using FastQC.

509  
510 Post QC and QT, the reads were aligned to the *Danio rerio* reference genome GRcZ10 /  
511 ENSEMBL release 84 using HISAT2 with the default parameters and additionally by  
512 providing the *-dta* flag. The resulting SAM alignments were then converted to BAM format  
513 and coordinate sorted using SAMtools v1.3.1. The sorted alignment files were then  
514 passed through HTSeq-count v0.6.1p1 using the following options (*-s no -t exon -l*  
515 *gene\_id*) for raw count generation. Concurrently, the sorted alignments were processed  
516 through Stringtie v1.3.0 for transcriptome quantification. Briefly the process looks like this,  
517 stringtie -> stringtie merge (to create a merged transcriptome GTF file of all the samples)  
518 -> stringtie (this time using the GTF generated by the previous merging step). Finally,  
519 Qualimap v2.2.2 was used to generate RNAseq specific QC metrics per sample.

520  
521 For quantitative reverse transcription PCR (qRT-PCR), RNA was reverse transcribed with  
522 qScript (QuantaBio, 95048-025) and performed using Maxima Sybr Green/ROX qPCR  
523 Master Mix Super Mix (Thermo Fisher, K0221). Samples were run in triplicate on  
524 QuantStudio 5 (Thermo Fisher). Target gene expression was normalized to *ribosomal*  
525 *protein large P0* (*rplp0*) using the comparative threshold cycle ( $\Delta$ Ct) method. Primers for  
526 the genes of interest are listed in **Table S9**. Expression in treated or genetically altered  
527 animals was compared to untreated and/or WT controls to determine fold change. All  
528 datasets are publicly available on GEO (GSE228754 and GSE156419).

### 529 *Image Acquisition*

531 For whole mount imaging of live larvae, embryos were anesthetized with 500  $\mu$ M tricaine  
532 (Ethyl 3-aminobenzoate methanesulfonate; Sigma-Aldrich), mounted in 3% methyl-  
533 cellulose on a glass slide and imaged on a Nikon SMZ25 stereomicroscope.

534

535 Nile Red powder (Invitrogen) was dissolved in methanol at a concentration of 1 mg/ $\mu$ L as  
536 the stock solution. At ~119 hpf, larvae were treated with 20  $\mu$ L of Nile Red for 1 hour.  
537 Fixed imaging was performed after the larvae were fixed at 120 hpf in 4%  
538 paraformaldehyde (UTECH). Before imaging, the larvae are washed with PBS (UTECH).  
539 Fixed larvae were transferred to 0.17 mm imaging plates (FlouoroDish) and embedded in  
540 1% low melting agarose gel (SeaPlaque Agarose, Lonza) and imaged using a super  
541 resolution microscope- Leica STED 3X at 63x water lens.

542

#### 543 *Steatosis Analysis*

544 The incidence and severity of steatosis in livers was determined using Imaris. The Area  
545 for each liver section was manually outlined and the number of lipids droplets was  
546 determined using the spot count function in Imaris. The number of spots was divided by  
547 the surface area of individual livers. To obtain the incidence, the percentage of livers with  
548 number of spots > 2 was divided by the total number of livers imaged per clutch.

549

#### 550 *IC-ICP-MS*

551 At 120 hpf, after 6-120 hpf iAs(III) exposure, 20 live larvae from each condition were  
552 collected and washed 5 times with embryos water, with all excess liquid removed. Tubes  
553 were immediately freeze dried (Lypholizer - Christ Alpha 1-2 LD plus) and stored at -80.  
554 Prior to sonication, 500  $\mu$ L of mobile phase ( 10 mM  $\text{NH}_4\text{H}_2\text{PO}_4$  (Sigma, 7722-76-1) in 5%  
555 Methanol, pH 7.9.) was added to each tube. Samples were sonicated with a probe  
556 sonicator (Branson) (2 min, 01 on, 02 off, 30% amplitude) on ice. Finally, samples were  
557 filtered (0.2  $\mu$ M; Pall Corp; 4552T) and quantified within 24 hours of preparation.

558

559 All measurements were carried out with an Agilent 7800 ICP-MS instrument (ICP-  
560 MS/Agilent Technologies, Japan), equipped with a MicroMist nebulizer and a Peltier-  
561 cooled (2 °C) scott-type spray chamber for sample introduction. For arsenic speciation  
562 studies, the metrohm 940 Professional IC Vario, an anion exchange column (RP-X100,  
563 250 mm  $\times$  4.1 mm i.d., Hamilton, USA) were used for anion exchange column liquid  
564 chromatography. Softwares used are MagicNet IC to interface with the ion  
565 chromatography system, masshunter for ICP-MS (with chromatographic analysis and  
566 advanced acquisition activated) and Maestranova with MS plugins for data analysis.  
567 Ultrapure water (18M $\Omega$  cm resistivity) was obtained from an integral 10 miliq water  
568 purification system (Millipore, Bedford, MA, USA). Standard 4 element, Agilent ICP-MS  
569 tuning stock solution was used for tuning and calibration. For Quantitative determination,  
570 solutions were prepared from ICP-MS standard stock for As at 1000 ppm (Agilent). IC-  
571 ICP-MS standards were: As(III) (Arsenic (III) Standard, Fisher Scientific; 1327-53-3),  
572 As(V) (Arsenic V Speciation Standard, Fisher Scientific; 7732-18-5, AsB (Arsenobetaine  
573 Standard Solution, LGC Standards; NIST-3033), DMA (Dimethylarsinic Acid Standard  
574 Solution, LGC Standards; NIST-3031) and MMA (Monomethylarsonic Acid Standard  
575 Solution, LGC Standards; NIST-3030). Using the 100  $\mu$ L injection loop, samples were  
576 loaded onto the column (PRP-X100, 250 mm  $\times$  4.1 mm i.d., Hamilton) at a flow of 1  
577 mL/min of mobile phase. The flow is analyzed using the ICP-MS with the following method  
578 conditions: Acquisition Mode (TRA) ,Plasma conditions: Radiofrequency power: 1550 W,  
579 tune mode: no gas, Plasma mode: General Purpose, Quick Scan: off, Independent,



580 Nebulizer Gas: 1.23 L/min, Monitoring mass <sup>75</sup>As. Analysis methods were run for 25  
581 minutes.

582  
583 **ROS Assay**

584 ROS level changes were determined as previously described (12) with the use of 5-(and-  
585 6)-chloromethyl-2',7'-dichlorodihydrofluorescein diacetate, acetyl ester (CM-H<sub>2</sub>DCFDA;  
586 Invitrogen). Medium from larvae was placed in culture media containing 5 μM CM-  
587 H<sub>2</sub>DCFDA for 90 minutes. Fifty μL of solutions were loaded onto 96 well plates in 3  
588 technical replicates. The fluorescence of each well was determined using Synergy H1  
589 Hybrid Multi-Mode Reader (BioTek), 485 nm and 530 nm emission (bottom read).

590  
591 **Statistical analysis, rigor and reproducibility**

592 All experiments were repeated on at least 2 clutches of embryos, when possible, with all  
593 replicates indicated. Reproducibility was assured by carrying phenotype scoring and other  
594 key experiments by independent investigators. Data are presented as normalized values.  
595 Statistical tests were used as appropriate to the specific analysis, including Student's T-  
596 test, ANOVA and Chi Square (Fisher's exact test) using Graphpad Prism Software or R  
597 to analyze the RNAseq data.

598  
599 **Author Contributions**

600 PD and KCS conceived the idea and planned the experiments. PD, NAK, MJO, EMAG,  
601 SP and KCS carried out the experiments and PD, KCS, NAK, MJO, EMAG, AS, SP and  
602 JT analyzed the data, PD prepared the figures and PD and KCS wrote the manuscript.

603  
604 **Acknowledgements**

605 The authors are grateful to Koichi Kawakami for the (*Tg(UAS:GFP;gSAIzGFFD886A)*)  
606 zebrafish line, Soja Soman for the *as3mt<sup>wt/tg</sup>* plasmid, Elena Magnani, Anjana Ramdas  
607 Nair, Eleanor Jenkins and Shashi Ranjan for technical support, and to all members of the  
608 Sadler lab for helpful discussions. The NYUAD Core Technology Platform Imaging and  
609 Genomics Facilities provided invaluable technical support. Gratitude for input from Kristin  
610 Gunsalus, Piergiorgio Percipalle, Andreas Hochwagen, and Max Costa.

611  
612



## 613 References

- 614
- 615 1. M. S. Rahaman *et al.*, Environmental arsenic exposure and its contribution to  
616 human diseases, toxicity mechanism and management. *Environ Pollut* **289**,  
617 117940 (2021).
  - 618 2. F. Faita, L. Cori, F. Bianchi, M. G. Andreassi, Arsenic-induced genotoxicity and  
619 genetic susceptibility to arsenic-related pathologies. *Int J Environ Res Public*  
620 *Health* **10**, 1527-1546 (2013).
  - 621 3. N. K. Roy, A. Murphy, M. Costa, Arsenic Methyltransferase and Methylation of  
622 Inorganic Arsenic. *Biomolecules* **10** (2020).
  - 623 4. A. Santra, J. Das Gupta, B. K. De, B. Roy, D. N. Guha Mazumder, Hepatic  
624 manifestations in chronic arsenic toxicity. *Indian J Gastroenterol* **18**, 152-155  
625 (1999).
  - 626 5. T. Lu *et al.*, Application of cDNA microarray to the study of arsenic-induced liver  
627 diseases in the population of Guizhou, China. *Toxicol Sci* **59**, 185-192 (2001).
  - 628 6. D. N. Guha Mazumder, Arsenic and liver disease. *J Indian Med Assoc* **99**, 311,  
629 314-315, 318-320 (2001).
  - 630 7. M. Palmgren *et al.*, AS3MT-mediated tolerance to arsenic evolved by multiple  
631 independent horizontal gene transfers from bacteria to eukaryotes. *PLoS One* **12**,  
632 e0175422 (2017).
  - 633 8. K. Jomova *et al.*, Arsenic: toxicity, oxidative stress and human disease. *Journal of*  
634 *applied toxicology : JAT* **31**, 95-107 (2011).
  - 635 9. Y. Fuse, V. T. Nguyen, M. Kobayashi, Nrf2-dependent protection against acute  
636 sodium arsenite toxicity in zebrafish. *Toxicol Appl Pharmacol* **305**, 136-142 (2016).
  - 637 10. M. Xu *et al.*, Oxidative Damage Induced by Arsenic in Mice or Rats: A Systematic  
638 Review and Meta-Analysis. *Biol Trace Elem Res* **176**, 154-175 (2017).
  - 639 11. K. Bambino *et al.*, Inorganic arsenic causes fatty liver and interacts with ethanol to  
640 cause alcoholic liver disease in zebrafish. *Dis Model Mech* **11** (2018).
  - 641 12. P. Delaney, A. Ramdas Nair, C. Palmer, N. Khan, K. C. Sadler, Arsenic induced  
642 redox imbalance triggers the unfolded protein response in the liver of zebrafish.  
643 *Toxicol Appl Pharmacol* **409**, 115307 (2020).
  - 644 13. J. De Loma *et al.*, Human adaptation to arsenic in Bolivians living in the Andes.  
645 *Chemosphere* **301**, 134764 (2022).
  - 646 14. K. Engström *et al.*, Polymorphisms in arsenic(+III oxidation state)  
647 methyltransferase (AS3MT) predict gene expression of AS3MT as well as arsenic  
648 metabolism. *Environ Health Perspect* **119**, 182-188 (2011).
  - 649 15. M. Chernoff *et al.*, Genetic Determinants of Reduced Arsenic Metabolism  
650 Efficiency in the 10q24.32 Region Are Associated With Reduced AS3MT  
651 Expression in Multiple Human Tissue Types. *Toxicol Sci* **176**, 382-395 (2020).
  - 652 16. Z. Drobna *et al.*, Disruption of the arsenic (+3 oxidation state) methyltransferase  
653 gene in the mouse alters the phenotype for methylation of arsenic and affects  
654 distribution and retention of orally administered arsenate. *Chem Res Toxicol* **22**,  
655 1713-1720 (2009).
  - 656 17. M. C. Huang, C. C. Douillet, M. Styblo, Knockout of arsenic (+3 oxidation state)  
657 methyltransferase results in sex-dependent changes in phosphatidylcholine  
658 metabolism in mice. *Arch Toxicol* **90**, 3125-3128 (2016).

- 659 18. M. C. Huang *et al.*, Metabolomic profiles of arsenic (+3 oxidation state)  
660 methyltransferase knockout mice: effect of sex and arsenic exposure. *Arch Toxicol*  
661 **91**, 189-202 (2017).
- 662 19. M. Sun, J. Tan, M. Wang, W. Wen, Y. He, Inorganic arsenic-mediated upregulation  
663 of AS3MT promotes proliferation of nonsmall cell lung cancer cells by regulating  
664 cell cycle genes. *Environmental Toxicology* **36**, 204-212 (2021).
- 665 20. M. Li *et al.*, A human-specific AS3MT isoform and BORCS7 are molecular risk  
666 factors in the 10q24.32 schizophrenia-associated locus. *Nat Med* **22**, 649-656  
667 (2016).
- 668 21. K. A. Aberg *et al.*, A comprehensive family-based replication study of  
669 schizophrenia genes. *JAMA Psychiatry* **70**, 573-581 (2013).
- 670 22. S. J. Washer *et al.*, Functional characterization of the schizophrenia associated  
671 gene AS3MT identifies a role in neuronal development. *Am J Med Genet B*  
672 *Neuropsychiatr Genet* **189**, 151-162 (2022).
- 673 23. K. Kawakami *et al.*, zTrap: zebrafish gene trap and enhancer trap database. *BMC*  
674 *Dev Biol* **10**, 105 (2010).
- 675 24. A. Ramdas Nair, P. Delaney, A. A. Koomson, S. Ranjan, K. C. Sadler, Systematic  
676 Evaluation of the Effects of Toxicant Exposure on Survival in Zebrafish Embryos  
677 and Larvae. *Curr Protoc* **1**, e231 (2021).
- 678 25. A. Popowich, Q. Zhang, X. C. Le, Arsenobetaine: the ongoing mystery. *National*  
679 *Science Review* **3**, 451-458 (2016).
- 680 26. C. H. Tseng, A review on environmental factors regulating arsenic methylation in  
681 humans. *Toxicol Appl Pharmacol* **235**, 338-350 (2009).
- 682 27. D. J. Thomas, S. B. Waters, M. Styblo, Elucidating the pathway for arsenic  
683 methylation. *Toxicol Appl Pharmacol* **198**, 319-326 (2004).
- 684 28. M. F. Hughes *et al.*, Arsenic (+3 oxidation state) methyltransferase genotype  
685 affects steady-state distribution and clearance of arsenic in arsenate-treated mice.  
686 *Toxicology and Applied Pharmacology* **249**, 217-223 (2010).
- 687 29. A. K. S. Camara, Y. Zhou, P. C. Wen, E. Tajkhorshid, W. M. Kwok, Mitochondrial  
688 VDAC1: A Key Gatekeeper as Potential Therapeutic Target. *Front Physiol* **8**, 460  
689 (2017).
- 690 30. S. Wan *et al.*, Hepatic PEMT activity mediates liver health, weight gain, and insulin  
691 resistance. *Faseb j* **33**, 10986-10995 (2019).
- 692 31. A. A. Noga, Y. Zhao, D. E. Vance, An Unexpected Requirement for  
693 Phosphatidylethanolamine N-Methyltransferase in the Secretion of Very Low  
694 Density Lipoproteins\*. *Journal of Biological Chemistry* **277**, 42358-42365 (2002).
- 695 32. L. Kussmaul, J. Hirst, The mechanism of superoxide production by  
696 NADH:ubiquinone oxidoreductase (complex I) from bovine heart mitochondria.  
697 *Proc Natl Acad Sci U S A* **103**, 7607-7612 (2006).
- 698 33. C. Koliaki *et al.*, Adaptation of hepatic mitochondrial function in humans with non-  
699 alcoholic fatty liver is lost in steatohepatitis. *Cell Metab* **21**, 739-746 (2015).
- 700 34. Y. Zhu *et al.*, System biology analysis reveals the role of voltage-dependent anion  
701 channel in mitochondrial dysfunction during non-alcoholic fatty liver disease  
702 progression into hepatocellular carcinoma. *Cancer Sci* **111**, 4288-4302 (2020).

- 703 35. R. P. Matthews *et al.*, TNF $\alpha$ -dependent hepatic steatosis and liver degeneration  
704 caused by mutation of zebrafish s-adenosylhomocysteine hydrolase. *Development*  
705 **136**, 865-875 (2009).
- 706 36. C. Prakash, S. Chhikara, V. Kumar, Mitochondrial Dysfunction in Arsenic-Induced  
707 Hepatotoxicity: Pathogenic and Therapeutic Implications. *Biological Trace*  
708 *Element Research* **200**, 261-270 (2022).
- 709 37. X. Ge, L. Zheng, M. Wang, Y. Du, J. Jiang, Prevalence trends in non-alcoholic fatty  
710 liver disease at the global, regional and national levels, 1990-2017: a population-  
711 based observational study. *BMJ Open* **10**, e036663 (2020).
- 712 38. B. L. Pierce *et al.*, Genome-wide association study identifies chromosome  
713 10q24.32 variants associated with arsenic metabolism and toxicity phenotypes in  
714 Bangladesh. *PLoS Genet* **8**, e1002522 (2012).
- 715 39. D. A. Delgado *et al.*, Rare, Protein-Altering Variants in AS3MT and Arsenic  
716 Metabolism Efficiency: A Multi-Population Association Study. *Environ Health*  
717 *Perspect* **129**, 47007 (2021).
- 718 40. C. M. Schlebusch *et al.*, Human Adaptation to Arsenic-Rich Environments.  
719 *Molecular Biology and Evolution* **32**, 1544-1555 (2015).
- 720 41. E. Bravo *et al.*, Coenzyme Q metabolism is disturbed in high fat diet-induced non-  
721 alcoholic fatty liver disease in rats. *Int J Mol Sci* **13**, 1644-1657 (2012).
- 722 42. A. A. Fouad, I. Jresat, Hepatoprotective effect of coenzyme Q10 in rats with  
723 acetaminophen toxicity. *Environ Toxicol Pharmacol* **33**, 158-167 (2012).
- 724 43. M. A. Farhangi, B. Alipour, E. Jafarvand, M. Khoshbaten, Oral coenzyme Q10  
725 supplementation in patients with nonalcoholic fatty liver disease: effects on serum  
726 vaspin, chemerin, pentraxin 3, insulin resistance and oxidative stress. *Arch Med*  
727 *Res* **45**, 589-595 (2014).
- 728 44. B. Fromenty, M. Roden, Mitochondrial alterations in fatty liver diseases. *Journal of*  
729 *Hepatology* **78**, 415-429 (2023).
- 730 45. R. Mehta *et al.*, The role of mitochondrial genomics in patients with non-alcoholic  
731 steatohepatitis (NASH). *BMC Med Genet* **17**, 63 (2016).
- 732 46. X. Zhu, J. Song, M. H. Mar, L. J. Edwards, S. H. Zeisel, Phosphatidylethanolamine  
733 N-methyltransferase (PEMT) knockout mice have hepatic steatosis and abnormal  
734 hepatic choline metabolite concentrations despite ingesting a recommended  
735 dietary intake of choline. *Biochem J* **370**, 987-993 (2003).
- 736 47. T. Qiu *et al.*, AS3MT facilitates NLRP3 inflammasome activation by m(6)A  
737 modification during arsenic-induced hepatic insulin resistance. *Cell Biol Toxicol*  
738 10.1007/s10565-022-09703-7, 1-17 (2022).
- 739 48. O. Zurita Rendón, L. Silva Neiva, F. Sasarman, E. A. Shoubridge, The arginine  
740 methyltransferase NDUFAF7 is essential for complex I assembly and early  
741 vertebrate embryogenesis. *Hum Mol Genet* **23**, 5159-5170 (2014).
- 742 49. J. M. Malecki, E. Davydova, P. Falnes, Protein methylation in mitochondria. *J Biol*  
743 *Chem* **298**, 101791 (2022).
- 744 50. S. Pittala, Y. Krelin, Y. Kuperman, V. Shoshan-Barmatz, A Mitochondrial VDAC1-  
745 Based Peptide Greatly Suppresses Steatosis and NASH-Associated Pathologies  
746 in a Mouse Model. *Mol Ther* **27**, 1848-1862 (2019).
- 747

## Figure Legends

**Figure 1. Loss of *as3mt* increases iAs accumulation and sensitivity in zebrafish larvae.** **A.** Representative images of WT and *as3mt*<sup>-/-</sup> larvae and adults. **B-C.** Standard length of larvae (µM; B) and adults (cm; C). **D.** Average IC-ICP-MS counts of AsB, AsIII, DMA, and MMA from WT (grey) or *as3mt*<sup>-/-</sup> (pink) zebrafish extracts after 0 (dotted lines) or 1 mM iAs (6-120 hpf) challenge (solid lines) (n = 40, 2 clutches). **E.** Percent survival of WT (grey) and *as3mt*<sup>-/-</sup> (pink) across 0, 0.5, 1.0, 1.5 and 2.0 mM iAs exposure from 6-120 hpf. Intersect with green line denotes the LC<sub>50</sub>. n = ~60, 3 clutches. **F.** Representative images of WT and *as3mt*<sup>-/-</sup> larvae during 0 mM, 1 mM acute (96-120 hpf), or 1 mM chronic (6-120 hpf) exposure to iAs. **G.** Images of 120 hpf zebrafish pigmentation at 0 mM or 1 mM chronic (6-120 hpf) iAs challenge (purple). Orange arrows mark pigmentation clusters. **H.** Quantification of pigmentation per larvae (n = 5-10, 1 clutch). **I.** Percent phenotype (normal (white), abnormal (grey) or dead (black) after 0-2 mM iAs exposure from 6-120 hpf (n = ~60, 3 clutches).

**Figure 2. Physiological loss of *as3mt* elicits significant non-tissue-specific transcriptomic alterations at 120 hpf in zebrafish larvae.** **A.** Representative images of 120 hpf WT and *as3mt*<sup>-/-</sup> whole larvae (orange) and livers (outlined in purple). **B.** Overlap of differentially expressed genes (DEGs) from pooled *as3mt*<sup>-/-</sup> whole larvae (orange) or larval livers (purple) RNAseq datasets. **C.** Cross plot of DEGs in WT and *as3mt*<sup>-/-</sup> with negatively correlated genes in grey. Pearson's correlation coefficient (r) and *as3mt* expression are marked in magenta. **D-E.** GO BP (D) and CC (E) of all positively correlated genes. **F.** Heatmap of Log<sub>2</sub>FC of genes from unified set from mitochondria genes in D (highlighted in pink) in larval, adult male and adult female livers.

**Figure 3. Loss or gain of *as3mt* is sufficient to alter TCA gene expression.** **A.** Representative images of transgenic zebrafish without (top; control) and with *as3mt* hepatic overexpression (*tg:fabp10a:as3mt, cryaa:DsRed; Tg-as3mt*<sup>wt/tg</sup>) (bottom). **B.** qPCR analysis of single livers micro-dissected from 120 hpf WT (white) or Tg-*as3mt*<sup>wt/tg</sup> (gold) zebrafish larvae for *as3mt* expression. **C.** DEGs from 120 hpf Tg-*as3mt*<sup>wt/tg</sup> livers compared to WT. **D.** Overlap of DEGs in *as3mt*<sup>-/-</sup> (pink) and Tg-*as3mt*<sup>wt/tg</sup> (gold). **E.** Cross plot of all DEGs. Negatively correlated genes are pink in blue (386/686). Pearson's correlation coefficient (r) and *as3mt* expression are marked in magenta. **F.** GO BP analysis of negatively correlated genes from **G.** UPSET plot genes from D. **H.** Heatmap of TCA cycle genes in *as3mt*<sup>-/-</sup> (top) and Tg-*as3mt*<sup>wt/tg</sup>.

**Figure 4. Loss of *as3mt* directly increases hepatic steatosis incidence and severity.** **A.** IPA image of *as3mt*<sup>-/-</sup> significant DEGs in oxidative phosphorylation pathway. **B.** ROS readouts from WT (white) or *as3mt*<sup>-/-</sup> (pink) zebrafish larvae. **C.** Representative confocal images of WT (left) and *as3mt*<sup>-/-</sup> (right) larval livers stained with Nile red. **D.** Percent steatosis incidence from each clutch. **E.** Severity of steatosis (# of lipid droplets / liver area) in each liver. n = 35 livers per genotype, 4 clutches. pval = 0.0020, unpaired t-test. **F.** Representative images of livers in WT, *as3mt*<sup>wt/tg</sup>, *as3mt*<sup>-/-</sup> and *as3mt*<sup>-/-</sup>; Tg-*as3mt*<sup>wt/tg</sup>. Quantification of incidence (**G**) and severity (**H**) for each group.

**Figure 5. Loss of *as3mt* induced mitochondrial dysfunction dictates greater cellular sensitivity to iAs(III) rather than iAs(III) accumulation during acute iAs exposure.** **A.** Treatment scheme of 1 mM iAs(III) from 96-120 hpf. **B.** PCA plot of all samples. **C.** Overlap of DEGs from untreated *as3mt*<sup>-/-</sup>, 1 mM treated WT, and 1 mM treated *as3mt*<sup>-/-</sup>. **D.** Cross plot of DEGs unique to untreated and 1 mM treated *as3mt*<sup>-/-</sup>. **E.** GO BP of pink genes from D. **F.** Log2FC of genes from *mitochondrial electron transport, NADH to ubiquinone*.

**Figure 6. Proposed mechanism of loss of *as3mt* induced hepatic steatosis**



## **Supplemental Figures**

**Figure S1. Endogenous *as3mt* is highly expressed and enzymatically active in zebrafish larvae.** **A.** Fluorescent images of endogenous *as3mt* transcription between 72-120 hours post fertilization (hpf). **B.** Overlay of brightfield and fluorescent images of a zebrafish larva at 120 hpf. **C.** Mean read counts from two RNAseq datasets of single livers from 120 hpf zebrafish larvae. *as3mt* is marked in red. **D.** IF of WT 120 hpf zebrafish liver with hoechst and anti-AS3MT. **E.** IC-ICP-MS data from 12.5, 3.125 and 0.75 ppb As standard mix (As(III), DMA, MMA, AsB and As(V)) and zebrafish extracts after exposure to 1 mM iAs from 6-120 hpf (black line).

**Figure S2. CRISPR/Cas9 mediated *as3mt* mutagenesis in zebrafish.** **A.** *as3mt* gene (16208 bp) with introns denoted as lines and exons as boxes. *as3mt* sgRNA targeted exon 3. **B.** 1% agarose gel of amplified *as3mt* exon 3 from 3 pools of 5 embryos (F1s) from CRISPR/Cas9 injected Founder B. PCR product was run without (-) and with (+) T7e1. **C.** 1% agarose gel of fin clips adults F1s from outcross of CRISPR/Cas9 injected Founder B without (-) and with (+) T7e1. Green denotes a positive carrier of edited *as3mt* whereas red denotes a negative carrier (WT) fish. **D.** 1% agarose gel of amplified *as3mt* from F2 fin clips with primers designed for either all of exon 3 (T7e1 primer), WT *as3mt*, or edited *as3mt*. Sanger sequencing results from a WT, heterozygous or homozygous *as3mt* edited gene above. **E.** Integrative Genomic Viewer (IGV) view of aligned RNAseq reads from F3 whole larvae from either an *as3mt*<sup>-/-</sup> (top) or WT incross (bottom). RNA from *as3mt*<sup>-/-</sup> larvae have an expected 8 bp deletion in exon 3 of *as3mt*. **D.** Translated RNA reads from WT or *as3mt*<sup>-/-</sup> (MUT) larvae.

**Figure S3. A.** Cross plot of overlapped DEGs in *as3mt*<sup>-/-</sup> whole larvae (x) and larval livers (y). **B.** GO BP analysis of blue genes from A.

**Figure S4. A.** PCA plot of male WT (purple) and *as3mt*<sup>-/-</sup> (green) and female WT (blue) and *as3mt*<sup>-/-</sup> (red) livers. **B.** Crossplot of DEGs from *as3mt*<sup>-/-</sup> males (burnt orange) and females (teal). **C.** Venn overlay of DEGs in *as3mt*<sup>-/-</sup> livers from larvae (purple), adult females (blue), and adult males (orange). **D.** Heatmap of 136 positively correlated genes from 85 + 50 + 162 overlay in D in larvae, males and female livers. **E.** Cross plot of shared DEGs in *as3mt*<sup>-/-</sup> livers from males (x) and larvae (y). **F.** Raw count data from *pemt* and *vdac1*.

**Figure S5. A.** Representative images of hepatocytes at 120 hpf expressing nls-mCherry (*tg(fabp10a:nls-mcherry)*) in control (left) and *as3mt*<sup>wt/tg</sup> larvae (right). **B.** Quantification of number of nuclei per liver size, n = ~15, 2 clutches. ns = not significant, unpaired t-test. **C.** Representative images of hepatocytes at 120 hpf expressing CAAX-eGFP (*tg(fabp10a:CAAX-eGFP)*) in control (left) and *as3mt*<sup>wt/tg</sup> larvae (right). **D.** Quantification of the area of hepatocytes, n = ~12, 2 clutches. ns = not significant, unpaired t-test. **E.** Representative images of bile ducts (*tg(tp1:β-globin-eGFP)*) in control (left) and *as3mt*<sup>wt/tg</sup> larvae (right). **F.** Number of nodes from bile duct images n = 14-22, 2 clutches. **G.** Representative images of bile ducts (*tg(tp1:β-globin-eGFP)*) and vasculature (*tg(flk1:ras-mCherry)*) in control (left) and *as3mt*<sup>wt/tg</sup> larvae (right). **H.** Representative fluorescent image

of 120 hpf control and *as3mt<sup>wt/tg</sup>* larvae fed with the BODIPY-tagged phospholipid PED6. Quantification of positive gallbladder PED6 accumulation below (n = 12-15, 1 clutch).

**Figure S6. A.** Cross plot of shared DEGs in WT (x) and *as3mt*<sup>-/-</sup> (y) larval livers. **B.** -Log(FDR) of top 20 GO BP pathways in 1 mM iAs (III) treated WT (white) and *as3mt*<sup>-/-</sup> (pink) larval livers. **C.** Cross plot of DEGs unique in 1 mM iAs(III) *as3mt*<sup>-/-</sup> (y) sample compared to WT (x). **D.** GO BP analysis of genes from C. **E.** -Log(FDR) of GO BP analysis of shared pathways in untreated *as3mt*<sup>-/-</sup> (light pink) or 1 mM iAs (III) exposed WT (grey) and *as3mt*<sup>-/-</sup> (pink) samples.

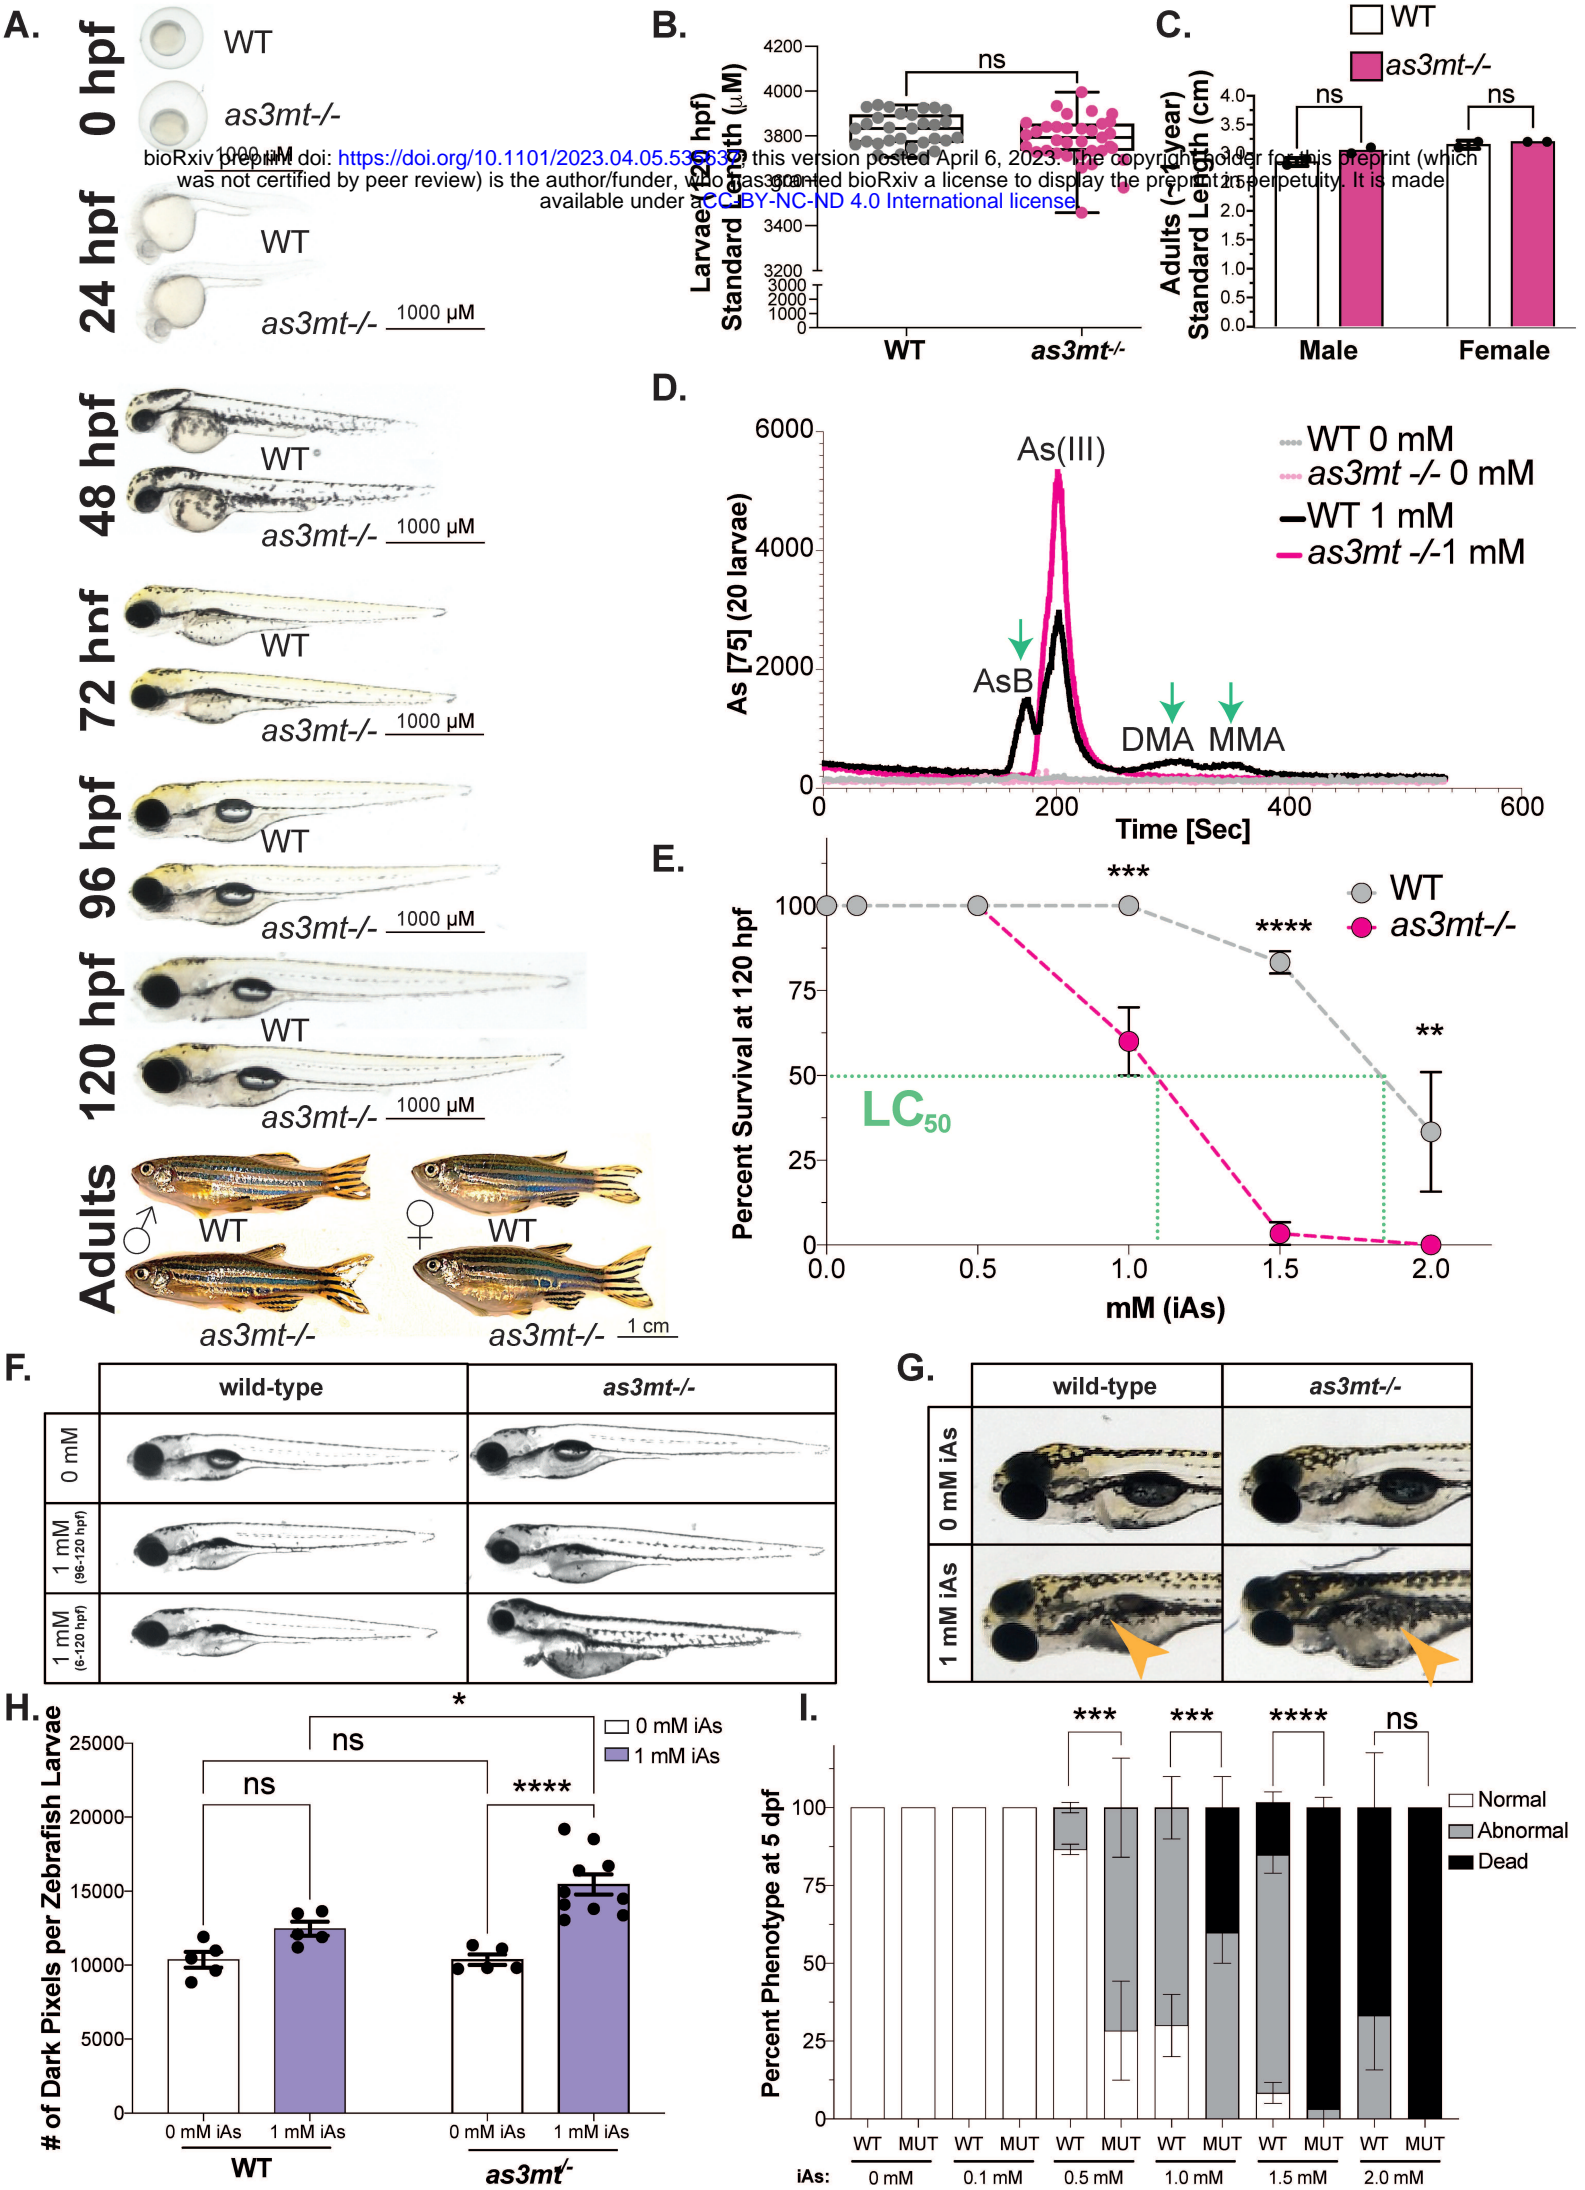

**Figure 1**



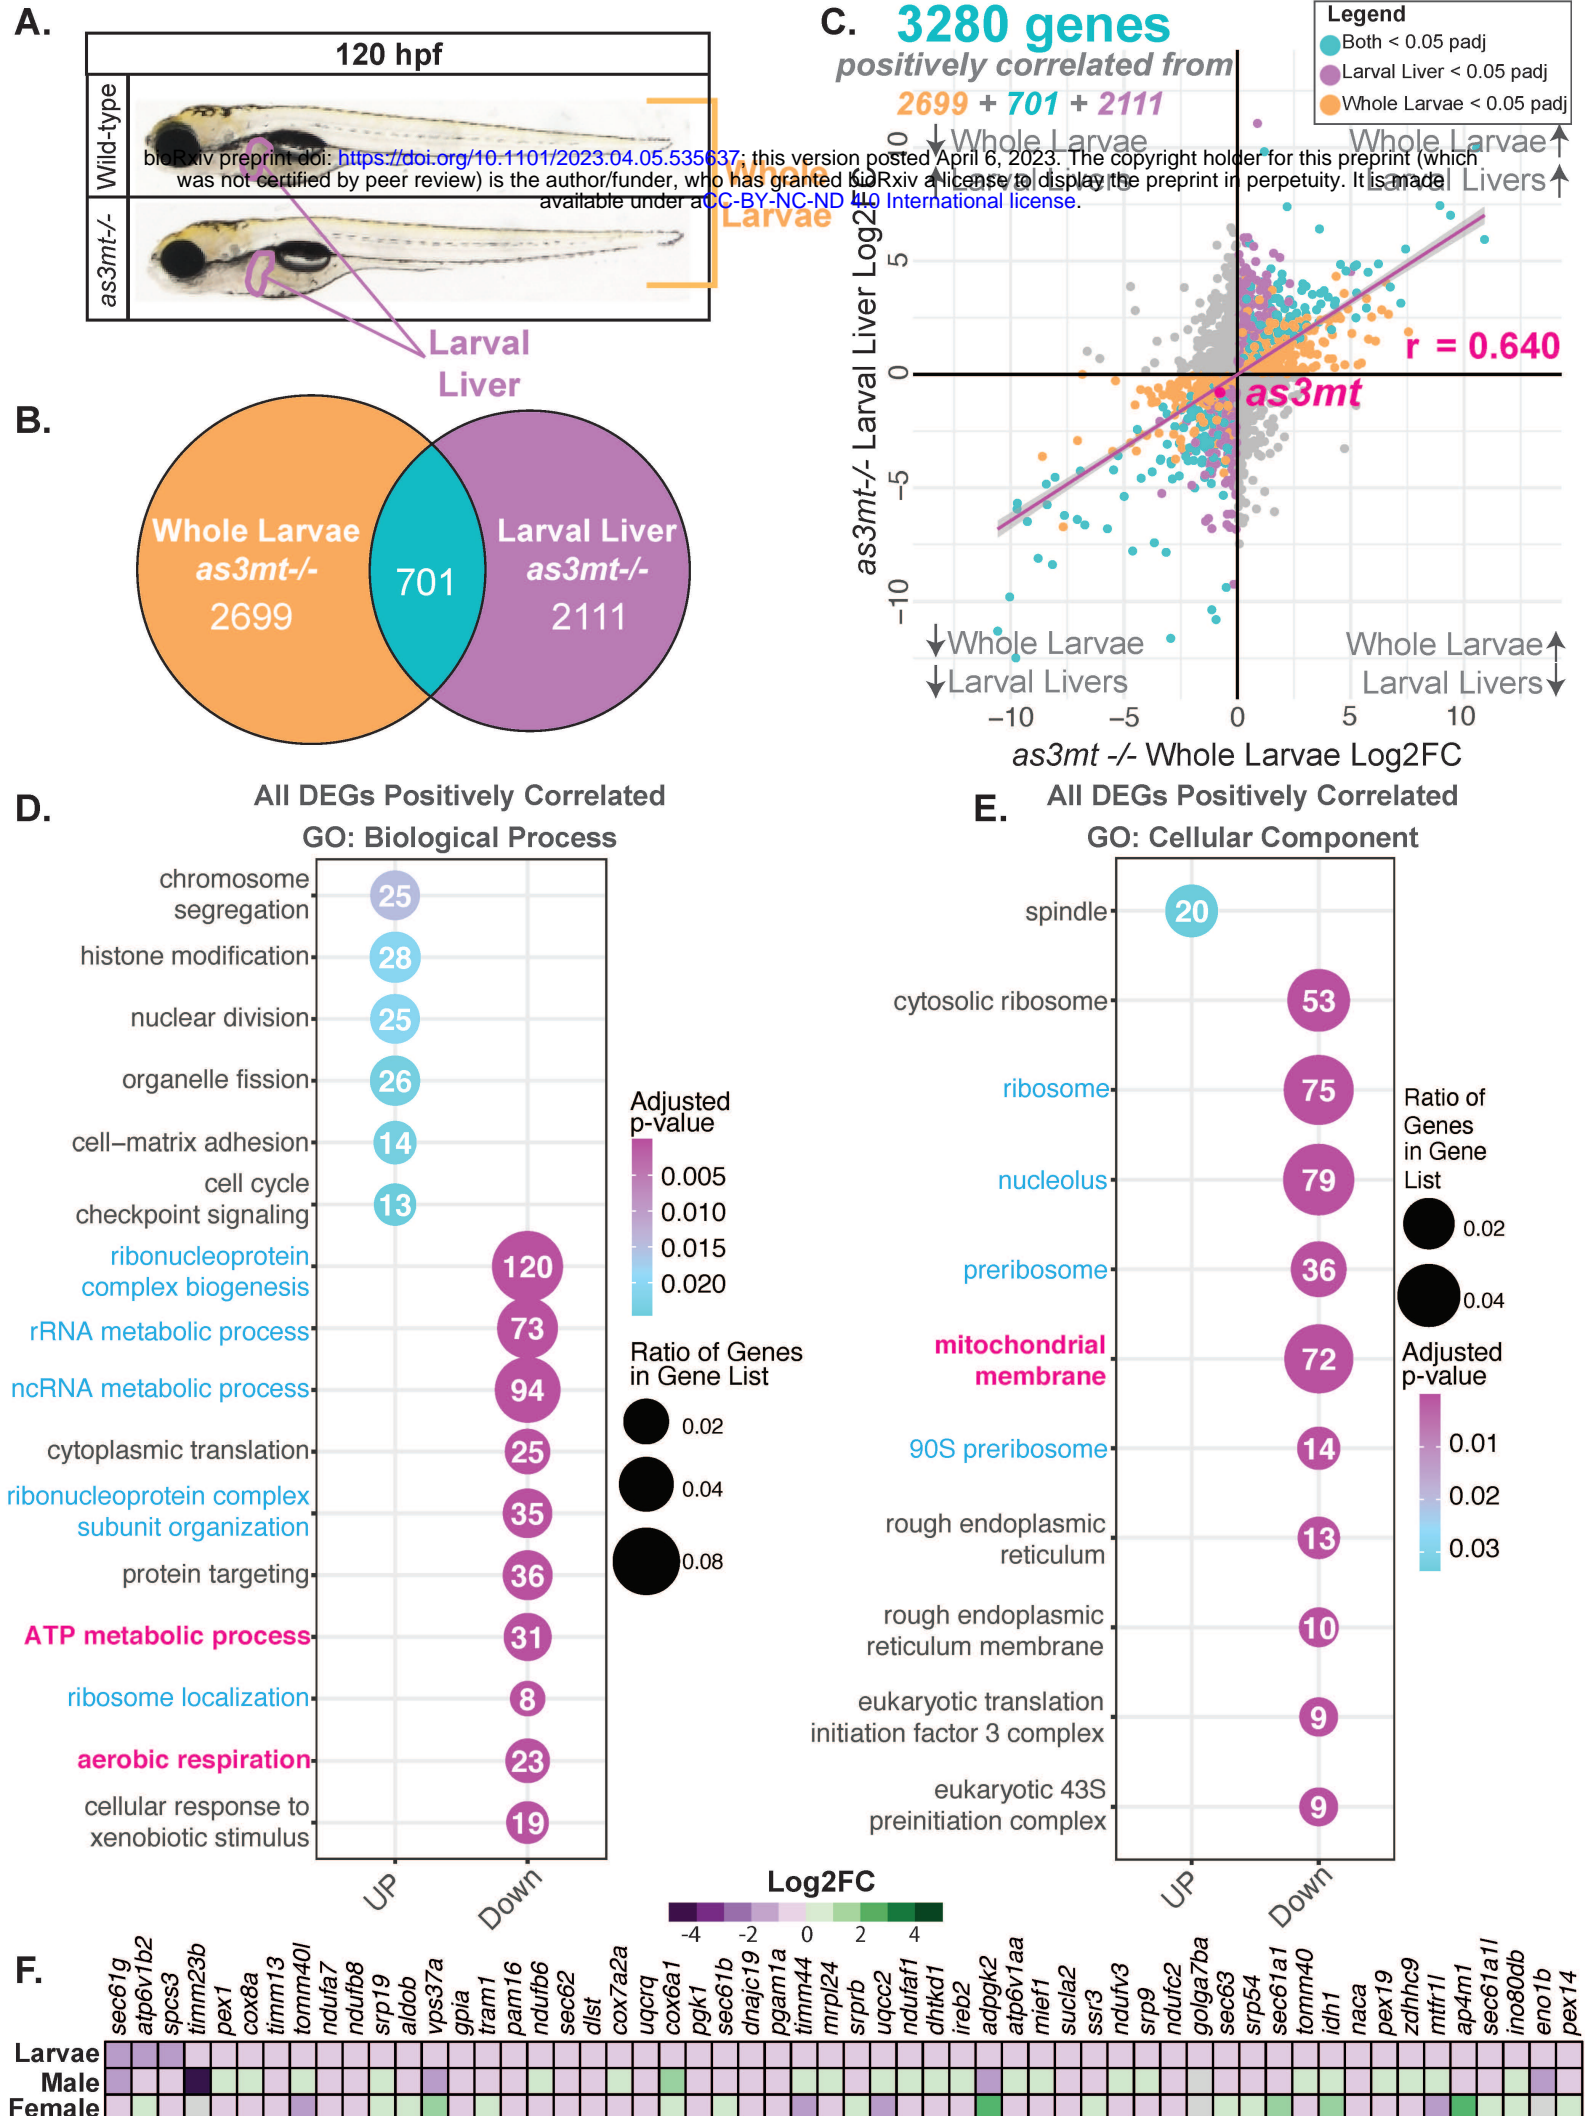

**Figure 2**

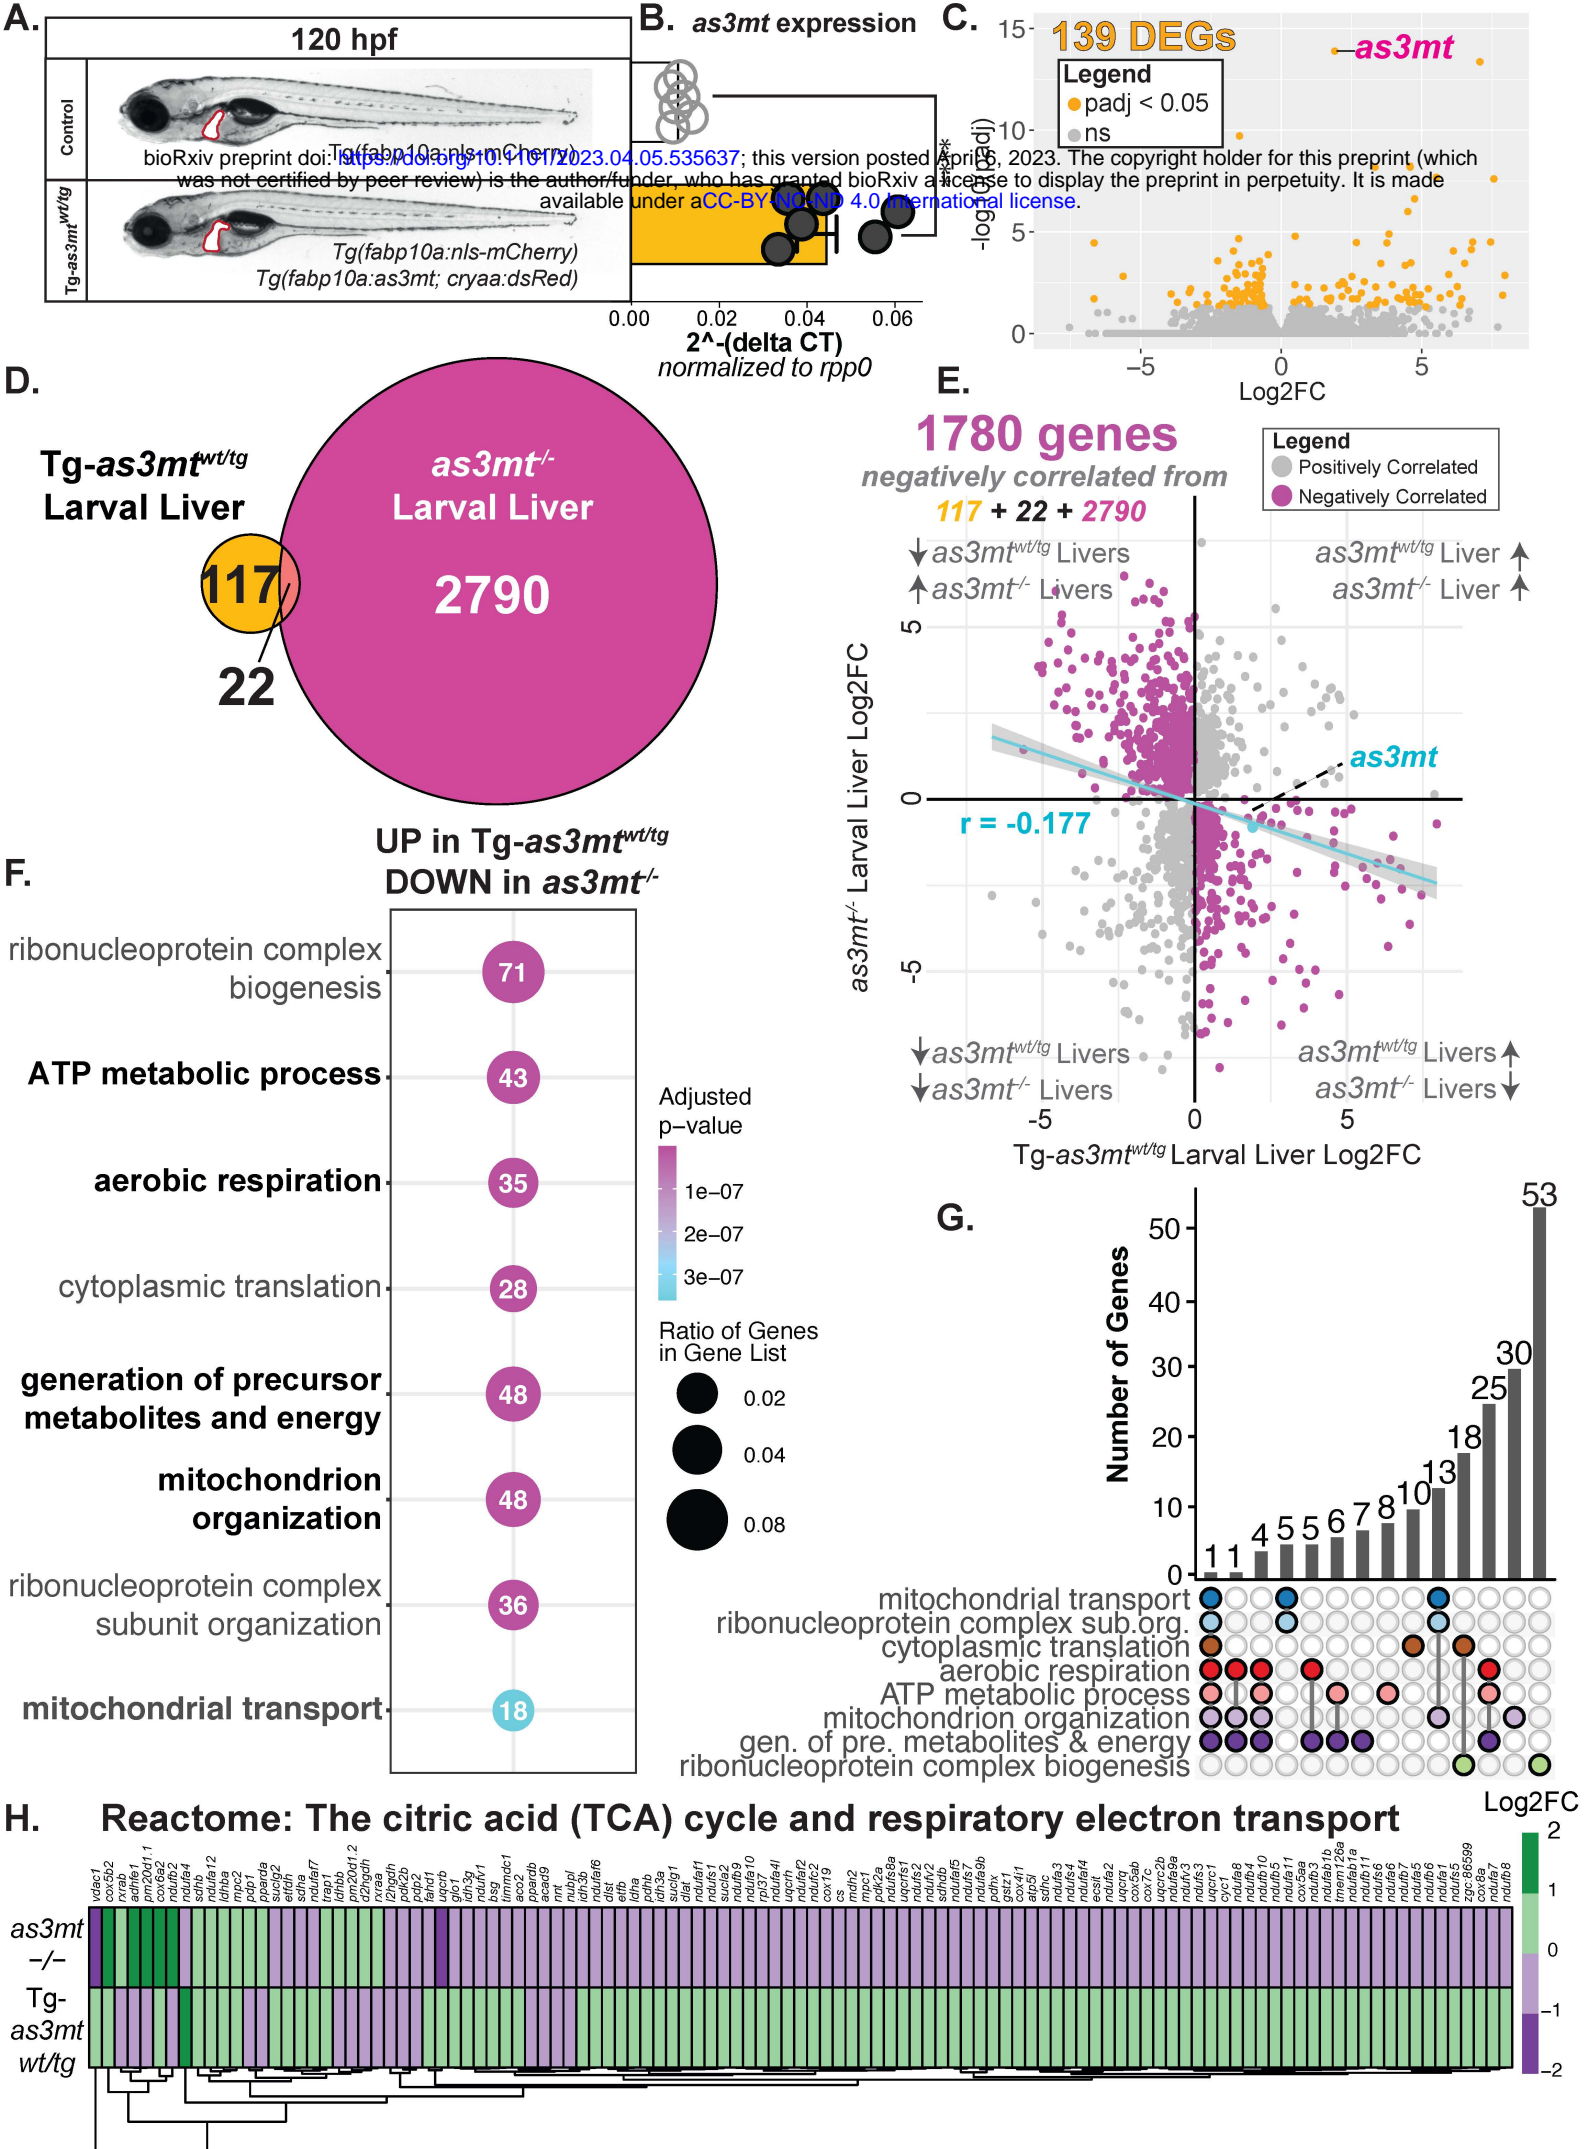

Figure 3



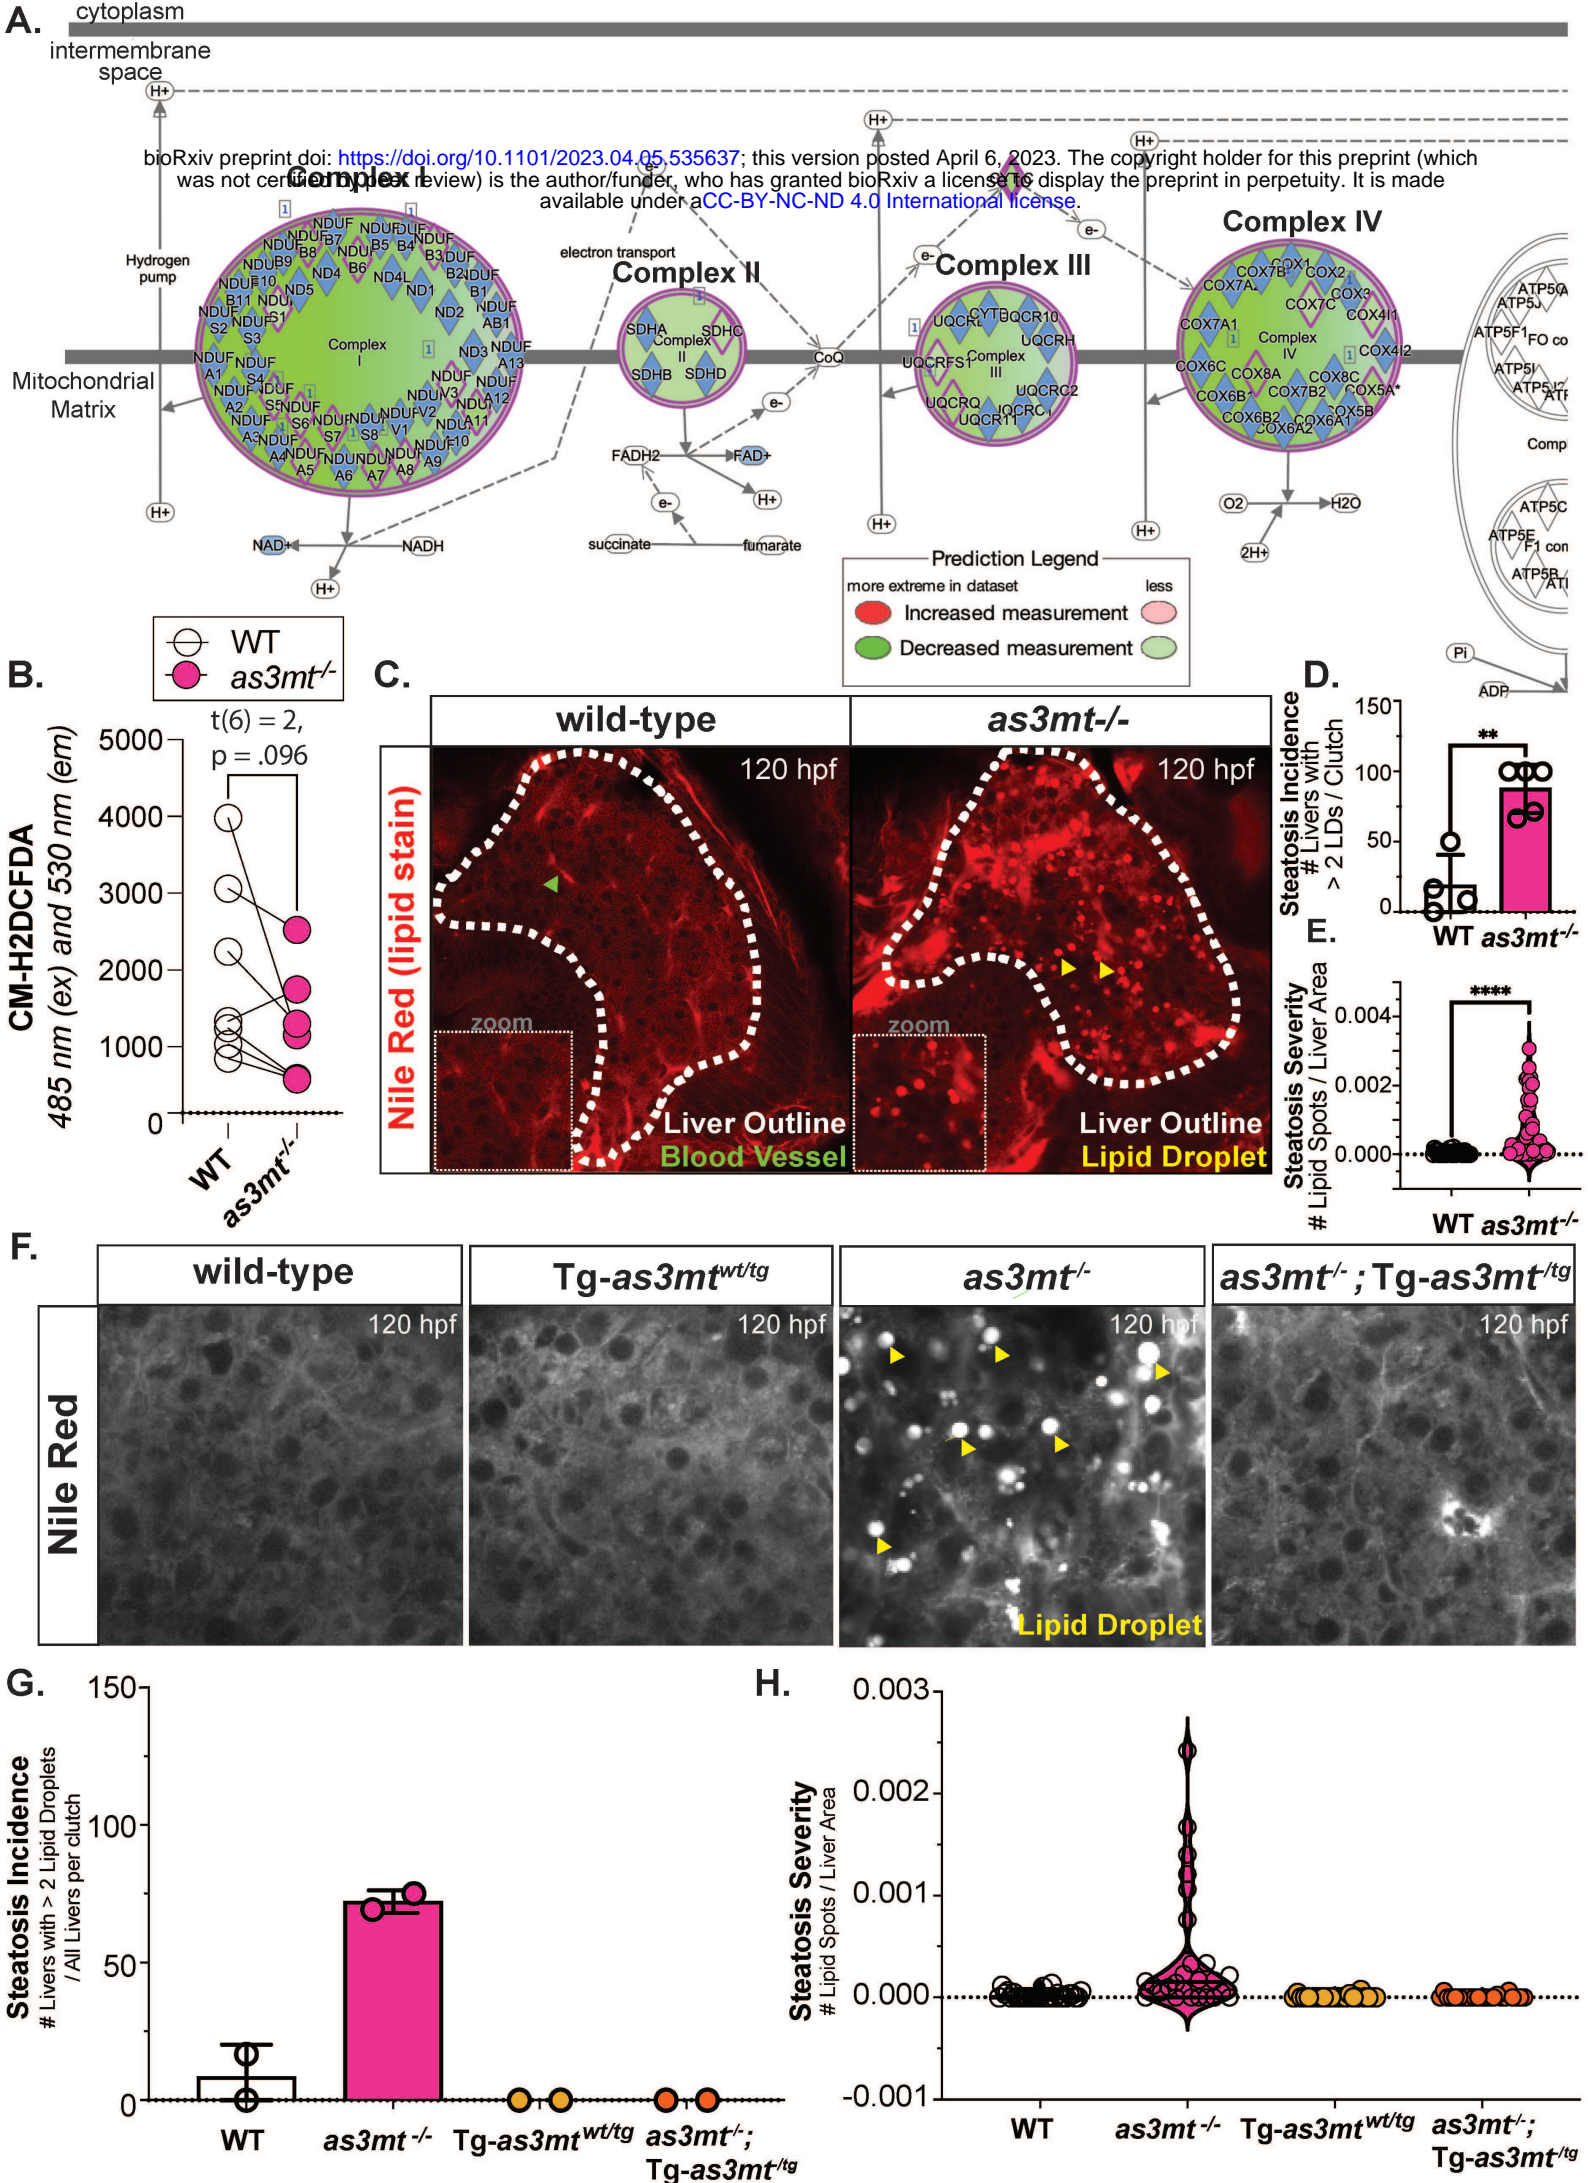

**Figure 4**

A. hpf 0 24 48 72 96 120

Liver Growth

Control

bioRxiv preprint doi: <https://doi.org/10.1101/2023.04.05.535637>; this version posted April 6, 2023. The copyright holder for this preprint (which was not certified by peer review) is the author/funder, who has granted bioRxiv a license to display the preprint in perpetuity. It is made available under aCC-BY-NC-ND 4.0 International license.

B.

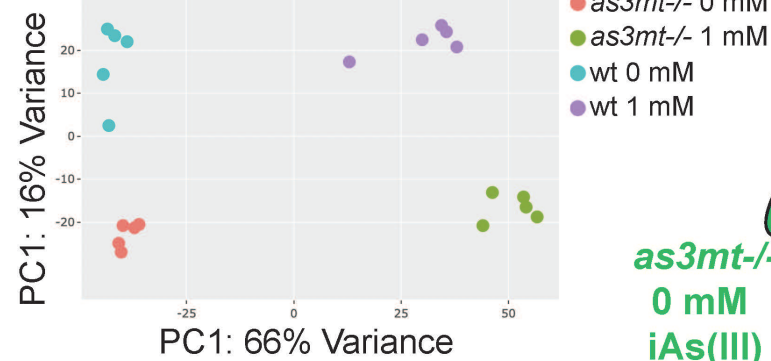

C.

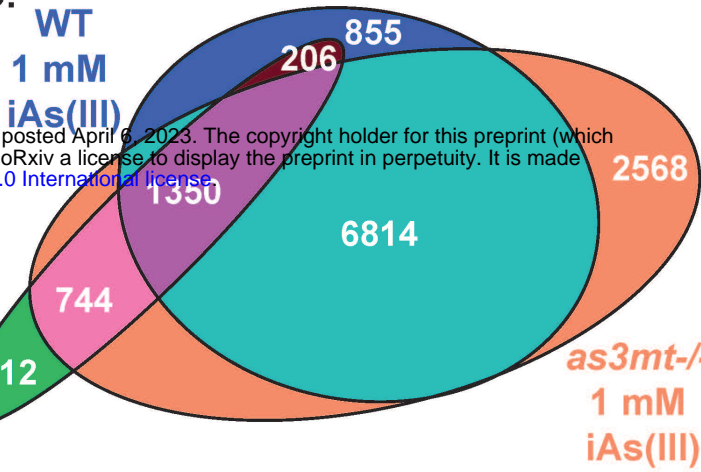

D.

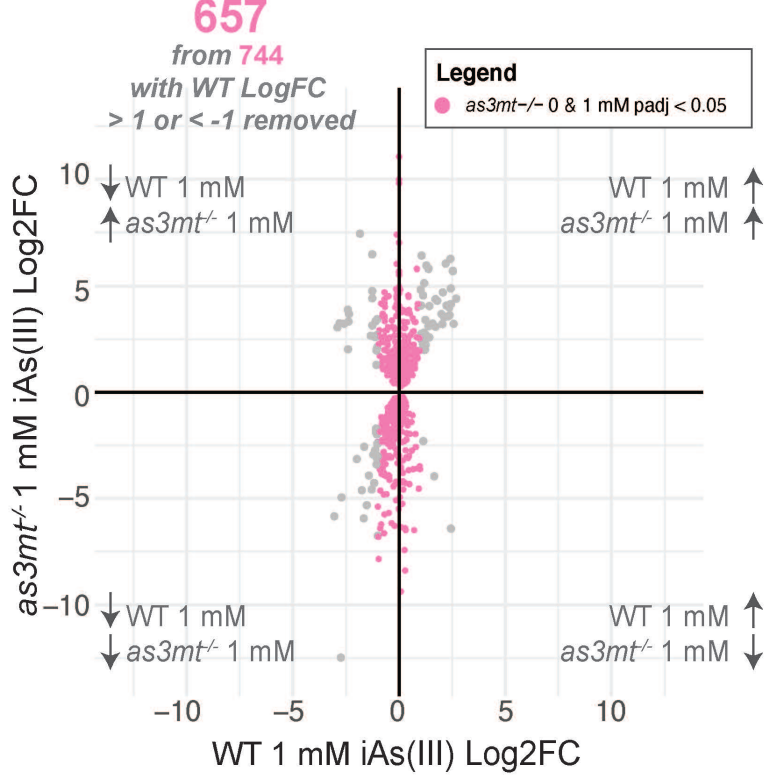

E.

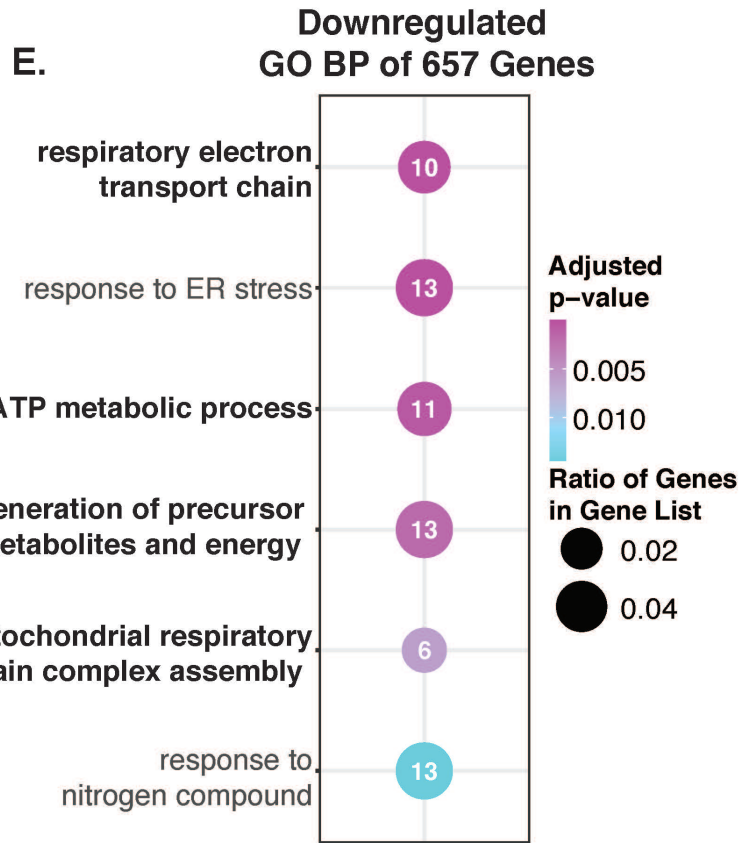

F.

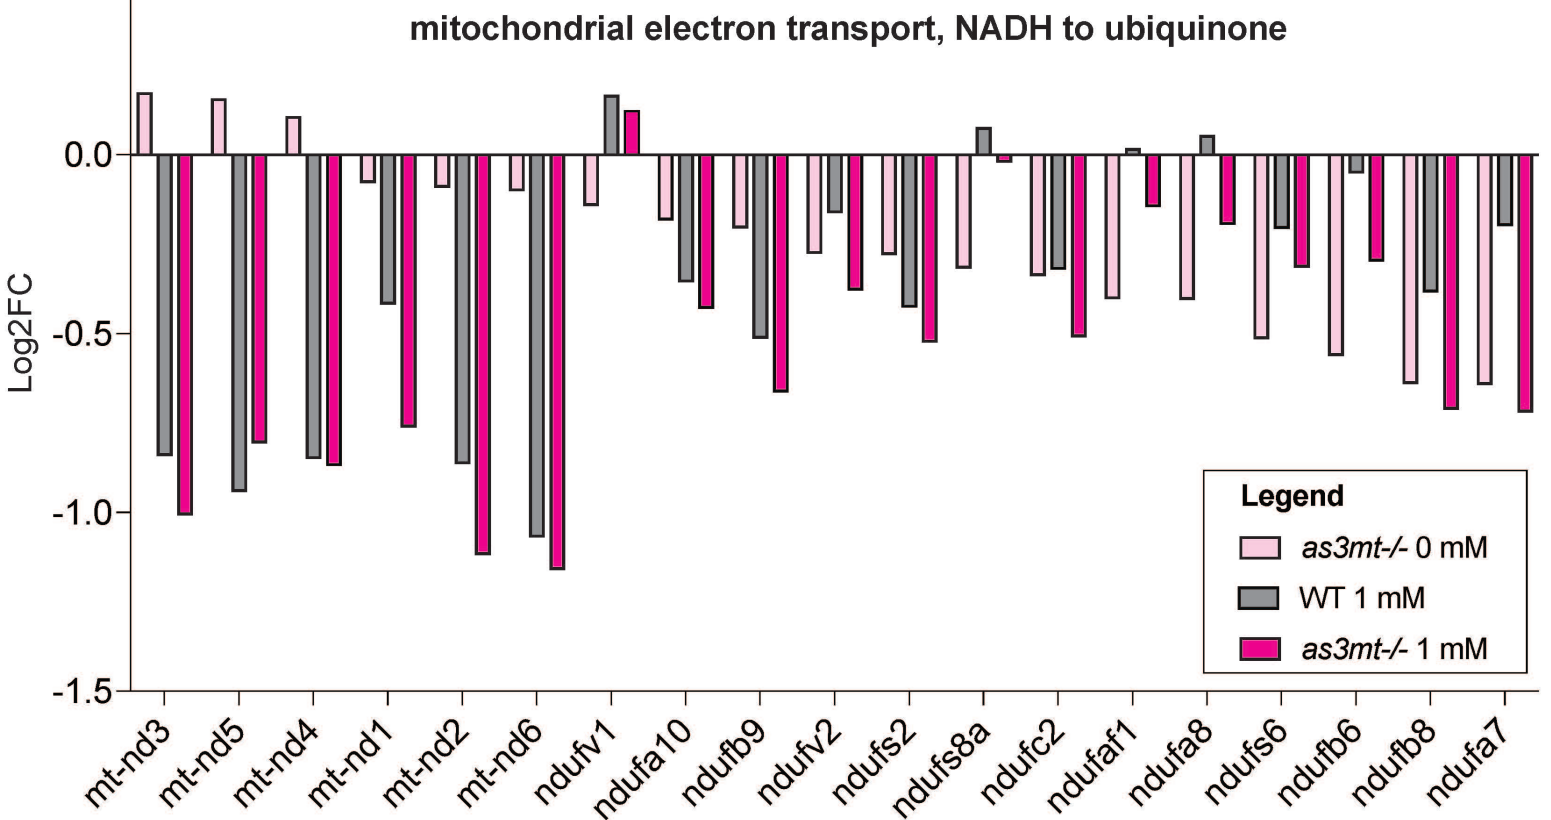



A.

Cytosol

bioRxiv preprint doi: <https://doi.org/10.1101/2023.04.05.535637>; this version posted April 6, 2023. The copyright holder for this preprint (which was not certified by peer review) is the author/funder, who has granted bioRxiv a license to display the preprint in perpetuity. It is made available under a [CC-BY-NC-ND 4.0 International license](#).

Nucleus

"Classical" As3mt Role

iAs(III) As(me)

As3mt

Pemt

Methionine  
Methionine  
cycle

ATP

SAM

SAH

Homocysteine

Phosphatidylethanolamine

VLDL Secretion  
PC synthesis

Phosphatidylcholine

Acetyl CoA  
TCA  
Cycle

Dlst

Suclg2

Nudf

Uqcr

Electron Chain  
Transport

Cox

Pyruvate  
Glucose  
Glutamate

Vdac1

Metabolic  
cross-talkNovel  
Mediator of  
& Mitochondrial  
Metabolic  
Function

B.

## Proposed Mechanism of Steatosis

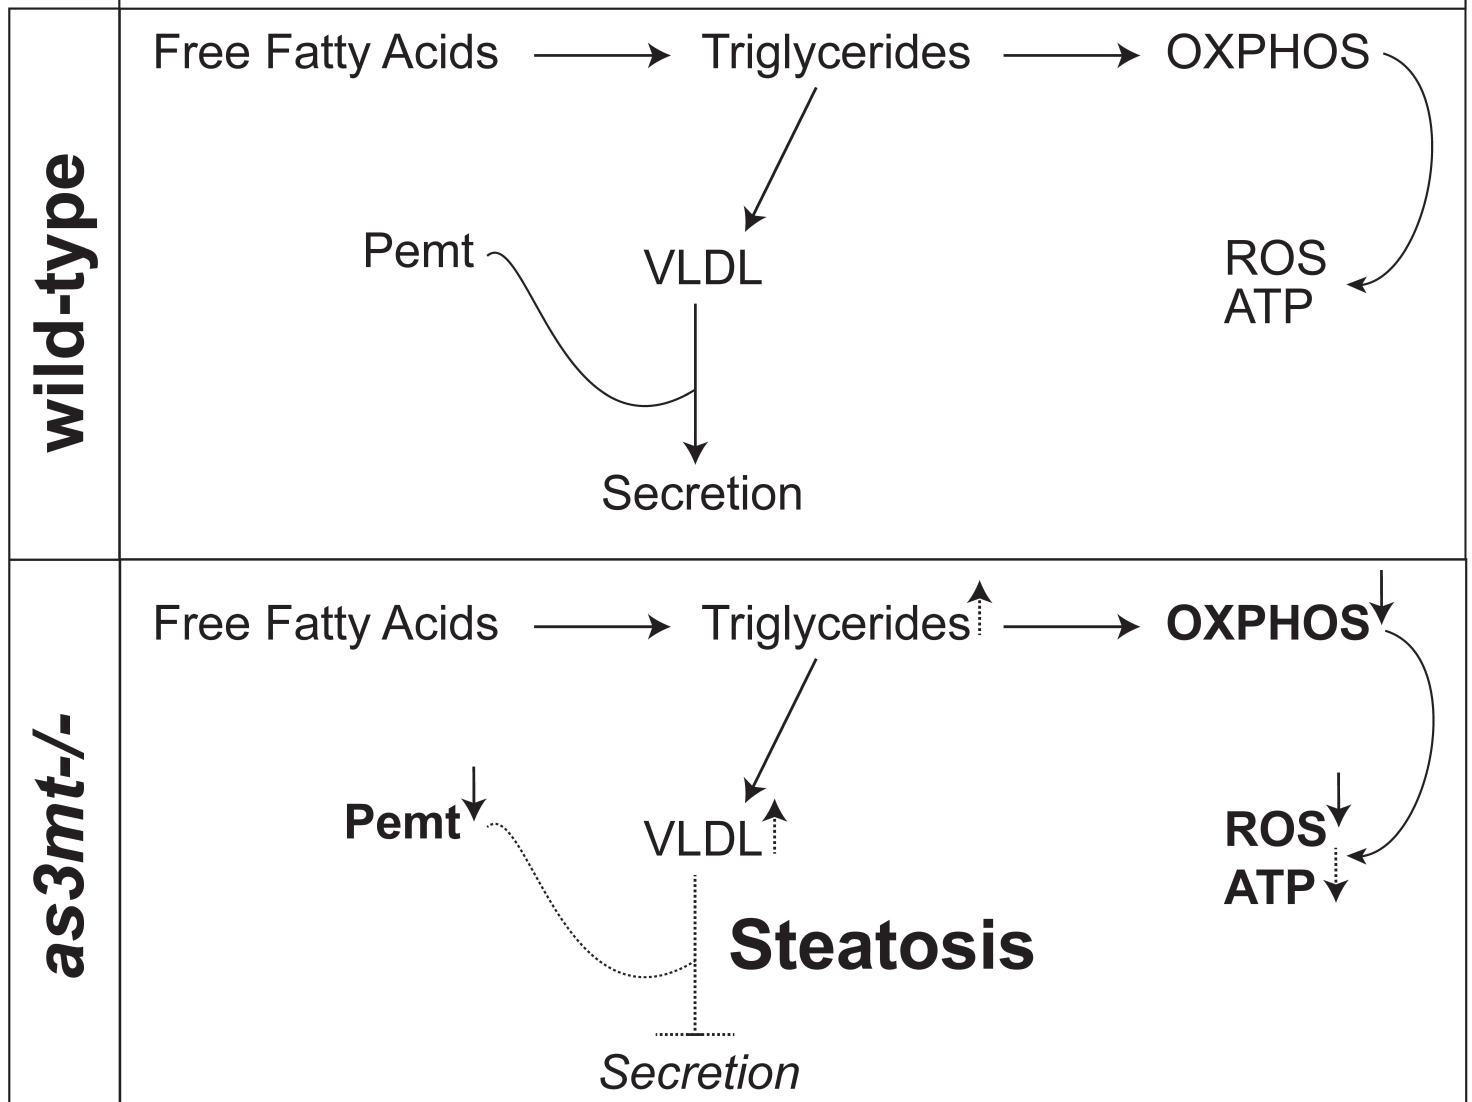

Source: https://www.biorxiv.org/content/biorxiv/early/2023/04/06/2023.04.05.535637.full.pdf
